# Supplementary material for: New computational protein design methods for de novo small molecule binding sites
Source: PubMed Central journal article supplement (PMC7575090; doi:10.1371/journal.pcbi.1008178), 2020-10-05

# Binding Site Recovery Benchmark Sequence Logos

## Contents

|           |             |           |
|-----------|-------------|-----------|
| <b>1</b>  | <b>5J5I</b> | <b>2</b>  |
| <b>2</b>  | <b>1SRI</b> | <b>3</b>  |
| <b>3</b>  | <b>2XN3</b> | <b>4</b>  |
| <b>4</b>  | <b>2QRY</b> | <b>5</b>  |
| <b>5</b>  | <b>5HZ8</b> | <b>6</b>  |
| <b>6</b>  | <b>1LNM</b> | <b>7</b>  |
| <b>7</b>  | <b>4QAC</b> | <b>8</b>  |
| <b>8</b>  | <b>5HZ6</b> | <b>9</b>  |
| <b>9</b>  | <b>5EDB</b> | <b>10</b> |
| <b>10</b> | <b>1LKE</b> | <b>11</b> |
| <b>11</b> | <b>5T52</b> | <b>12</b> |
| <b>12</b> | <b>5J5G</b> | <b>13</b> |
| <b>13</b> | <b>3CZ1</b> | <b>14</b> |
| <b>14</b> | <b>3OKI</b> | <b>15</b> |
| <b>15</b> | <b>4AFG</b> | <b>16</b> |
| <b>16</b> | <b>4AFH</b> | <b>17</b> |
| <b>17</b> | <b>6M9B</b> | <b>18</b> |
| <b>18</b> | <b>4B5D</b> | <b>19</b> |
| <b>19</b> | <b>1N0S</b> | <b>20</b> |
| <b>20</b> | <b>2IZL</b> | <b>21</b> |
| <b>21</b> | <b>5URA</b> | <b>22</b> |
| <b>22</b> | <b>1TOU</b> | <b>23</b> |

# 1 1N0S

(a) special\_rot bonus: 0.0

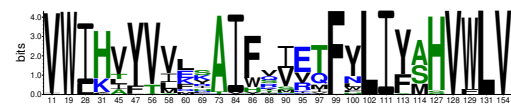

(b) special\_rot bonus: -0.5

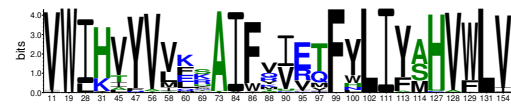

(c) special\_rot bonus: -1.0

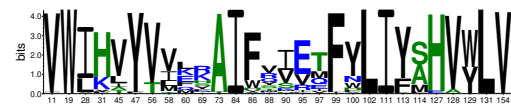

(d) special\_rot bonus: -1.5

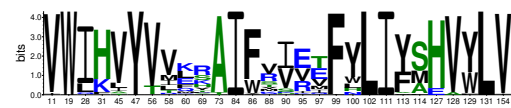

(e) special\_rot bonus: -2.0

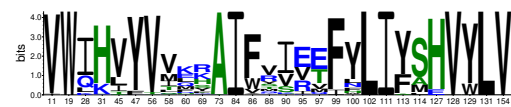

(f) special\_rot bonus: -2.5

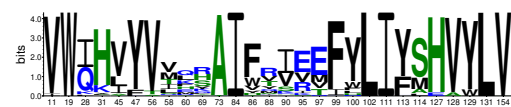

(g) special\_rot bonus: -3.0

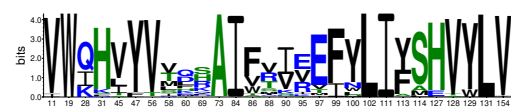

(h) special\_rot bonus: -3.5

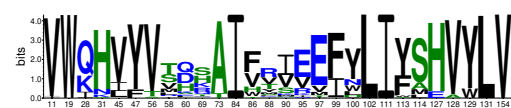

(i) special\_rot bonus: -4.0

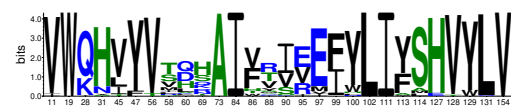

(j) special\_rot bonus: -4.5

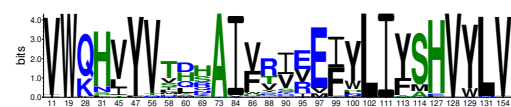

(k) special\_rot bonus: -5.0

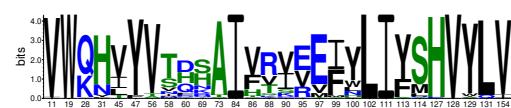

(l) special\_rot bonus: -6.0

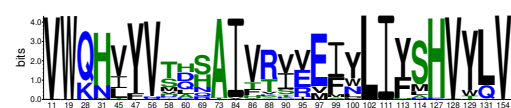

(m) special\_rot bonus: -8.0

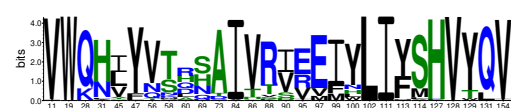

(n) special\_rot bonus: -10.0

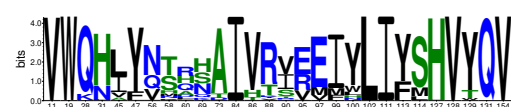

(o) special\_rot bonus: Control

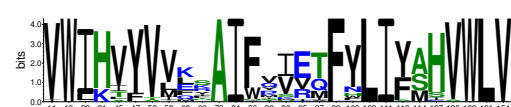

(p) special\_rot bonus: Native

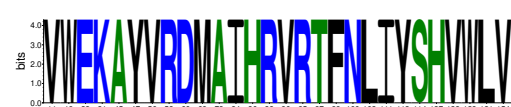

## 2 5URA

(a) special\_rot bonus: 0.0

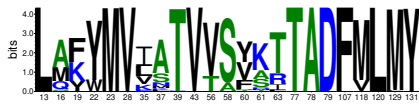

(b) special\_rot bonus: -0.5

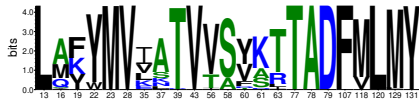

(c) special\_rot bonus: -1.0

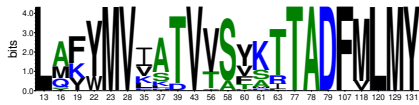

(d) special\_rot bonus: -1.5

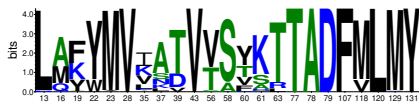

(e) special\_rot bonus: -2.0

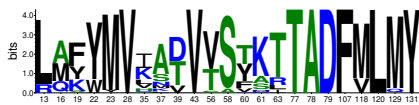

(f) special\_rot bonus: -2.5

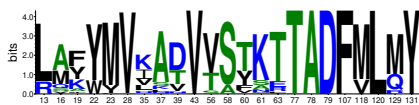

(g) special\_rot bonus: -3.0

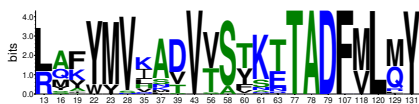

(h) special\_rot bonus: -3.5

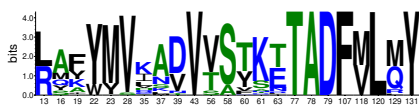

(i) special\_rot bonus: -4.0

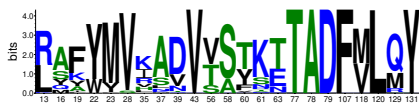

(j) special\_rot bonus: -4.5

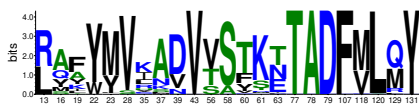

(k) special\_rot bonus: -5.0

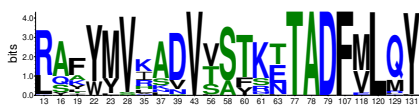

(l) special\_rot bonus: -6.0

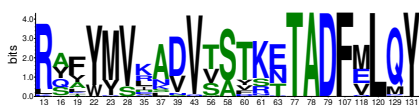

(m) special\_rot bonus: -8.0

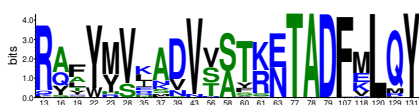

(n) special\_rot bonus: -10.0

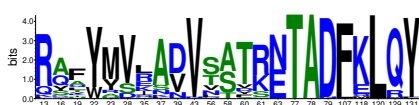

(o) special\_rot bonus: Control

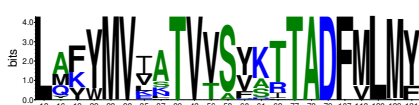

(p) special\_rot bonus: Native

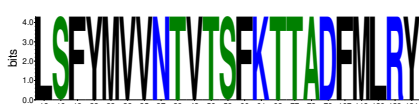

### 3 5J5I

(a) special\_rot bonus: 0.0

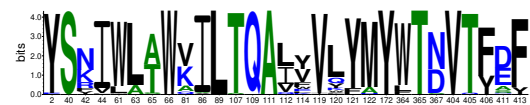

(b) special\_rot bonus: -0.5

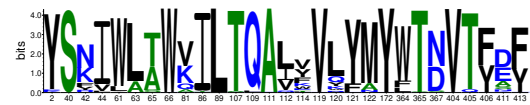

(c) special\_rot bonus: -1.0

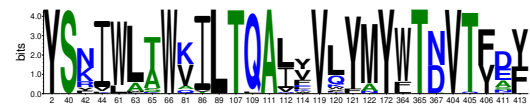

(d) special\_rot bonus: -1.5

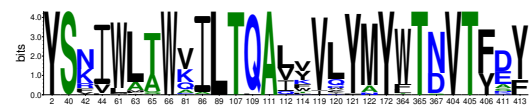

(e) special\_rot bonus: -2.0

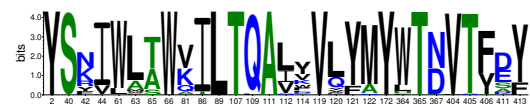

(f) special\_rot bonus: -2.5

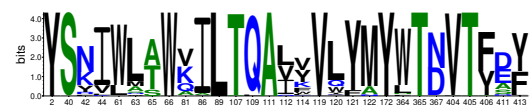

(g) special\_rot bonus: -3.0

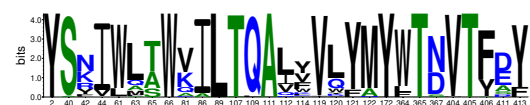

(h) special\_rot bonus: -3.5

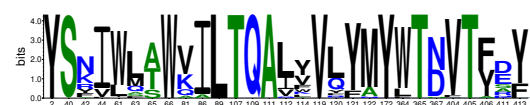

(i) special\_rot bonus: -4.0

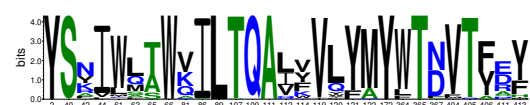

(j) special\_rot bonus: -4.5

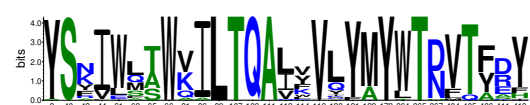

(k) special\_rot bonus: -5.0

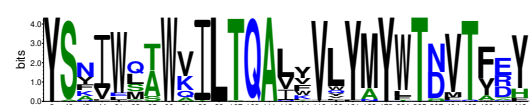

(l) special\_rot bonus: -6.0

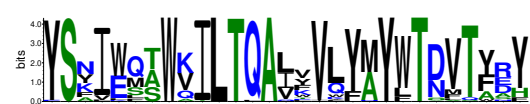

(m) special\_rot bonus: -8.0

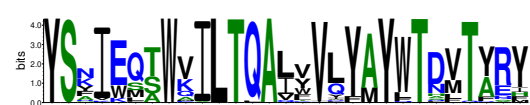

(n) special\_rot bonus: -10.0

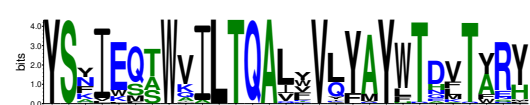

(o) special\_rot bonus: Control

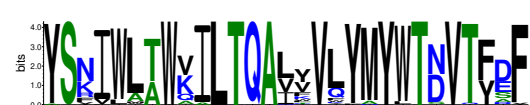

(p) special\_rot bonus: Native

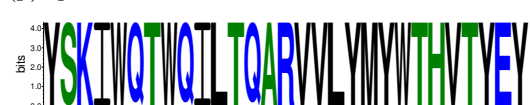

## 4 4B5D

(a) special\_rot bonus: 0.0

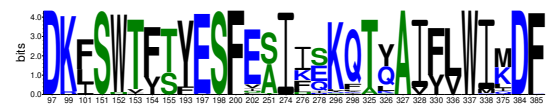

(b) special\_rot bonus: -0.5

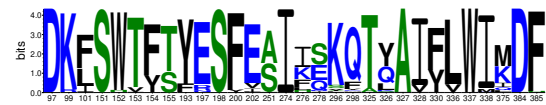

(c) special\_rot bonus: -1.0

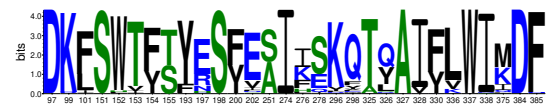

(d) special\_rot bonus: -1.5

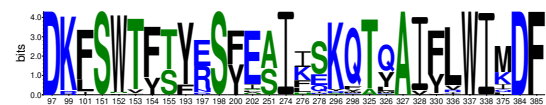

(e) special\_rot bonus: -2.0

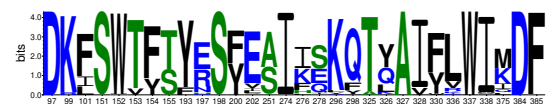

(f) special\_rot bonus: -2.5

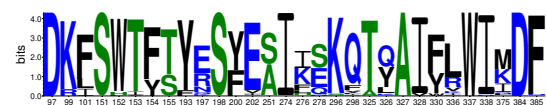

(g) special\_rot bonus: -3.0

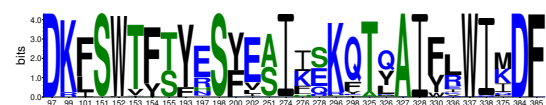

(h) special\_rot bonus: -3.5

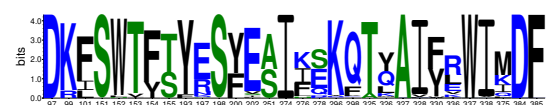

(i) special\_rot bonus: -4.0

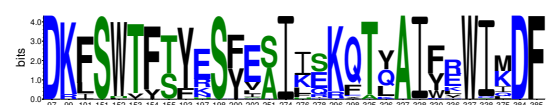

(j) special\_rot bonus: -4.5

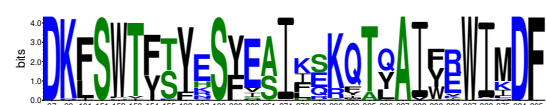

(k) special\_rot bonus: -5.0

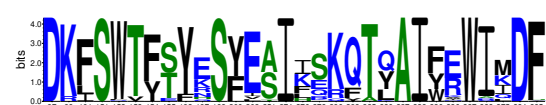

(l) special\_rot bonus: -6.0

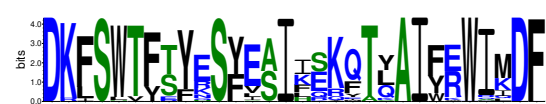

(m) special\_rot bonus: -8.0

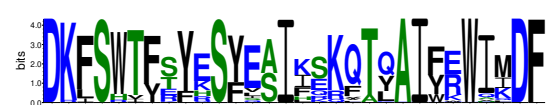

(n) special\_rot bonus: -10.0

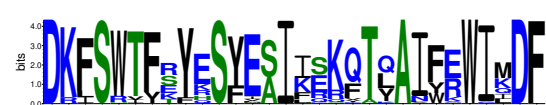

(o) special\_rot bonus: Control

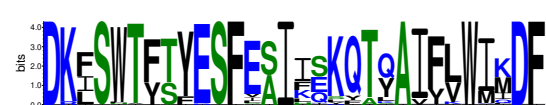

(p) special\_rot bonus: Native

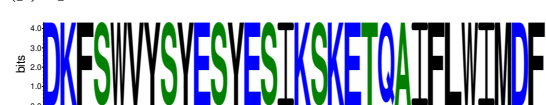

# 5 5J5G

(a) special\_rot bonus: 0.0

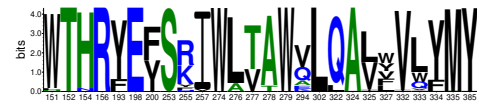

(b) special\_rot bonus: -0.5

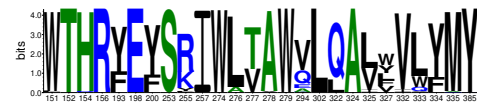

(c) special\_rot bonus: -1.0

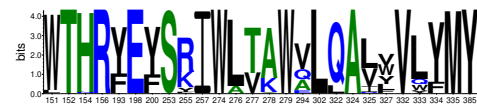

(d) special\_rot bonus: -1.5

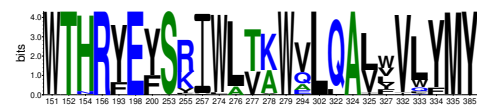

(e) special\_rot bonus: -2.0

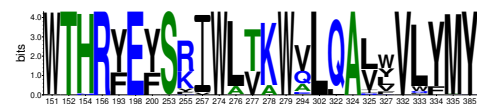

(f) special\_rot bonus: -2.5

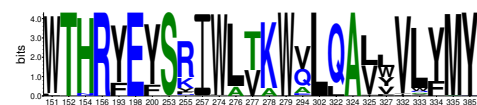

(g) special\_rot bonus: -3.0

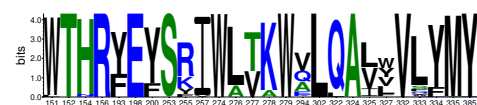

(h) special\_rot bonus: -3.5

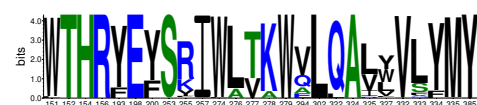

(i) special\_rot bonus: -4.0

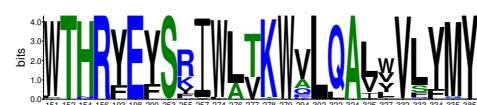

(j) special\_rot bonus: -4.5

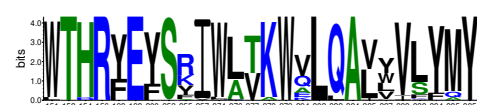

(k) special\_rot bonus: -5.0

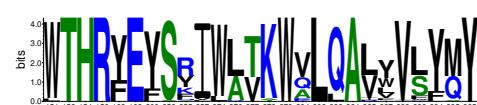

(l) special\_rot bonus: -6.0

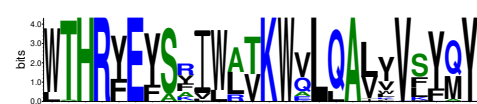

(m) special\_rot bonus: -8.0

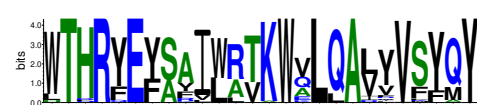

(n) special\_rot bonus: -10.0

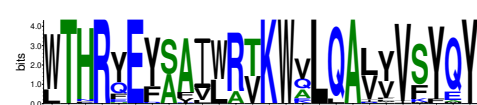

(o) special\_rot bonus: Control

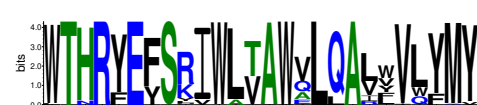

(p) special\_rot bonus: Native

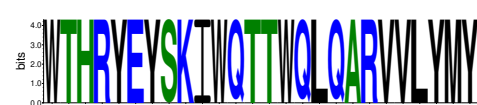

## 6 4QAC

(a) special\_rot bonus: 0.0

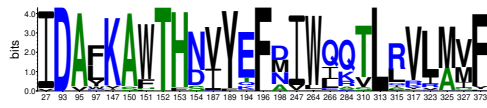

(b) special\_rot bonus: -0.5

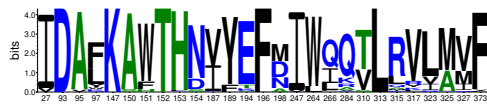

(c) special\_rot bonus: -1.0

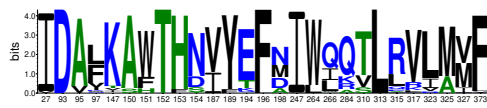

(d) special\_rot bonus: -1.5

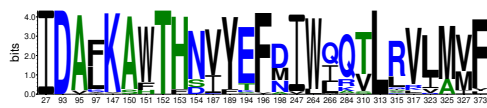

(e) special\_rot bonus: -2.0

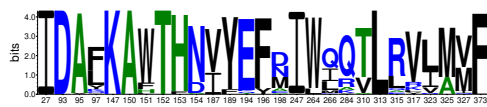

(f) special\_rot bonus: -2.5

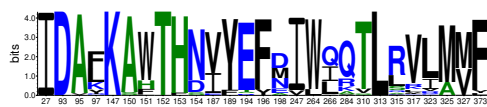

(g) special\_rot bonus: -3.0

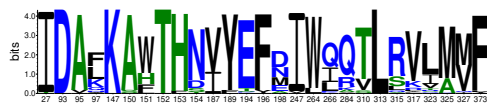

(h) special\_rot bonus: -3.5

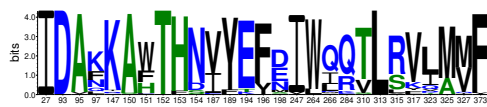

(i) special\_rot bonus: -4.0

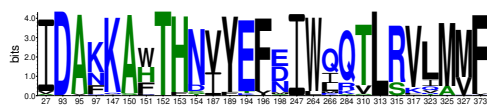

(j) special\_rot bonus: -4.5

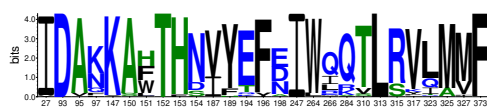

(k) special\_rot bonus: -5.0

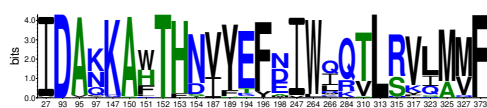

(l) special\_rot bonus: -6.0

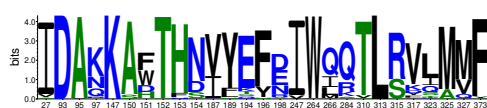

(m) special\_rot bonus: -8.0

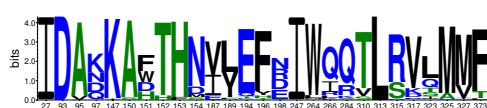

(n) special\_rot bonus: -10.0

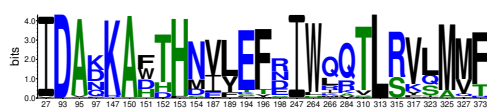

(o) special\_rot bonus: Control

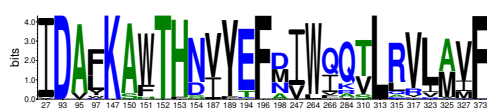

(p) special\_rot bonus: Native

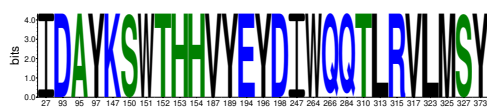



# 7 1LNM

(a) special\_rot bonus: 0.0

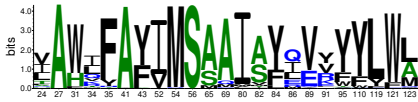

(b) special\_rot bonus: -0.5

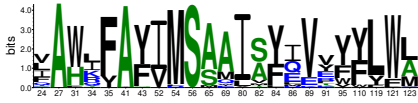

(c) special\_rot bonus: -1.0

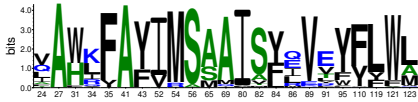

(d) special\_rot bonus: -1.5

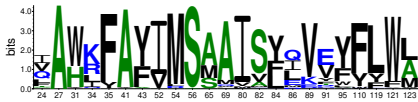

(e) special\_rot bonus: -2.0

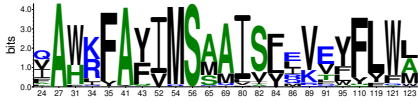

(f) special\_rot bonus: -2.5

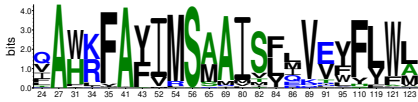

(g) special\_rot bonus: -3.0

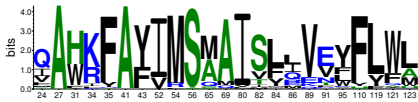

(h) special\_rot bonus: -3.5

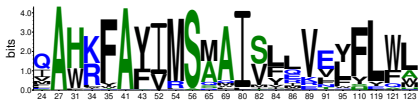

(i) special\_rot bonus: -4.0

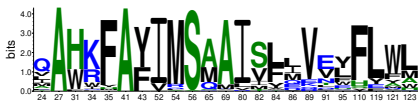

(j) special\_rot bonus: -4.5

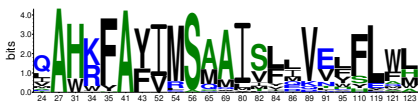

(k) special\_rot bonus: -5.0

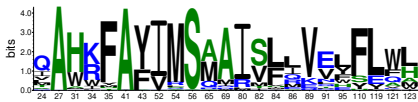

(l) special\_rot bonus: -6.0

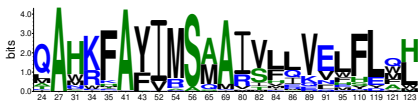

(m) special\_rot bonus: -8.0

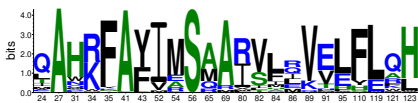

(n) special\_rot bonus: -10.0

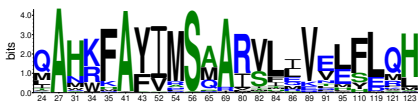

(o) special\_rot bonus: Control

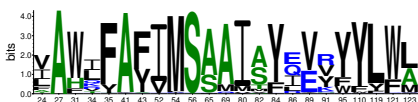

(p) special\_rot bonus: Native

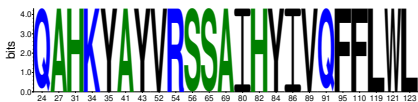



# 8 3CZ1

(a) special\_rot bonus: 0.0

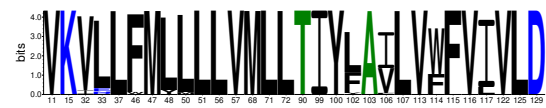

(b) special\_rot bonus: -0.5

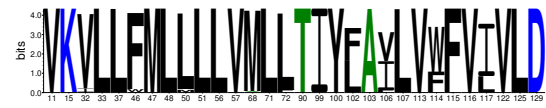

(c) special\_rot bonus: -1.0

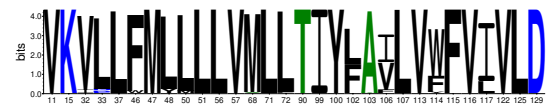

(d) special\_rot bonus: -1.5

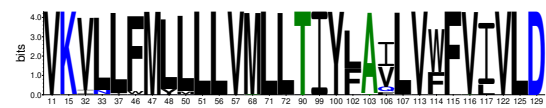

(e) special\_rot bonus: -2.0

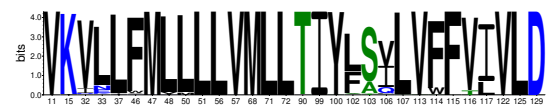

(f) special\_rot bonus: -2.5

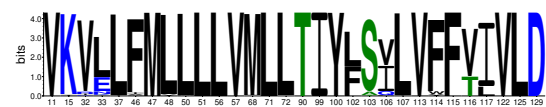

(g) special\_rot bonus: -3.0

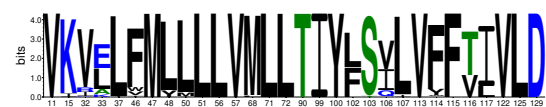

(h) special\_rot bonus: -3.5

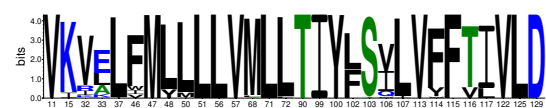

(i) special\_rot bonus: -4.0

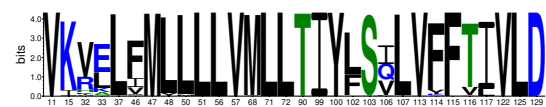

(j) special\_rot bonus: -4.5

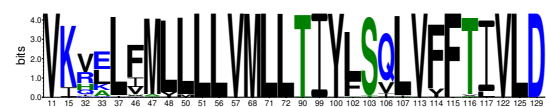

(k) special\_rot bonus: -5.0

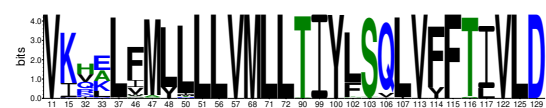

(l) special\_rot bonus: -6.0

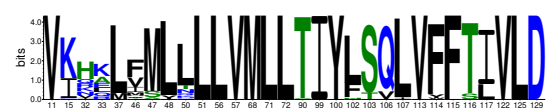

(m) special\_rot bonus: -8.0

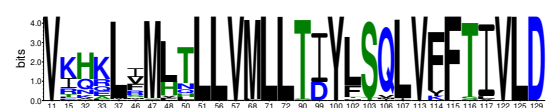

(n) special\_rot bonus: -10.0

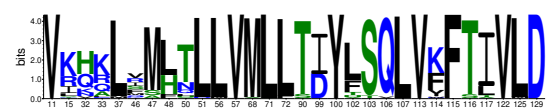

(o) special\_rot bonus: Control

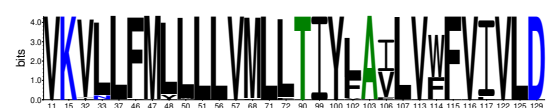

(p) special\_rot bonus: Native

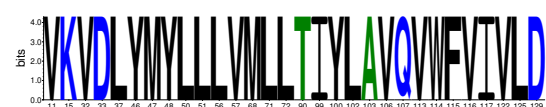



# 10 5EDB

(a) special\_rot bonus: 0.0

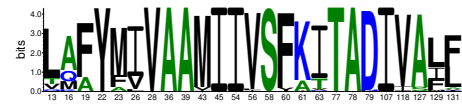

(b) special\_rot bonus: -0.5

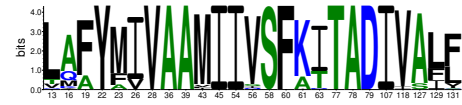

(c) special\_rot bonus: -1.0

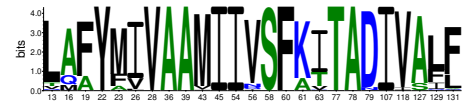

(d) special\_rot bonus: -1.5

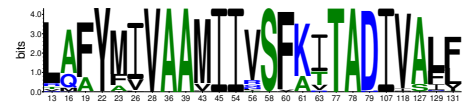

(e) special\_rot bonus: -2.0

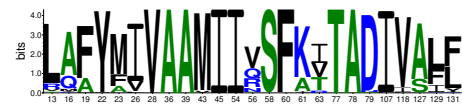

(f) special\_rot bonus: -2.5

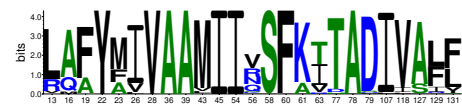

(g) special\_rot bonus: -3.0

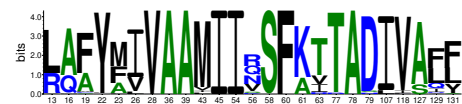

(h) special\_rot bonus: -3.5

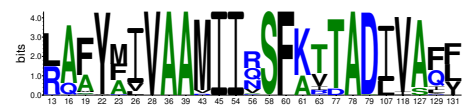

(i) special\_rot bonus: -4.0

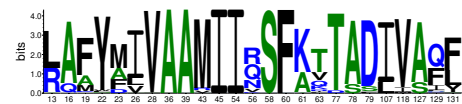

(j) special\_rot bonus: -4.5

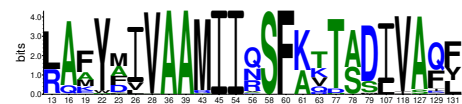

(k) special\_rot bonus: -5.0

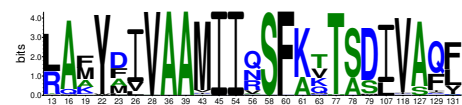

(l) special\_rot bonus: -6.0

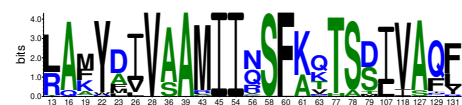

(m) special\_rot bonus: -8.0

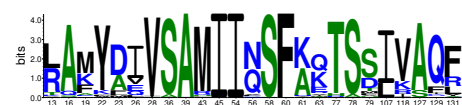

(n) special\_rot bonus: -10.0

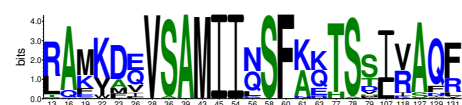

(o) special\_rot bonus: Control

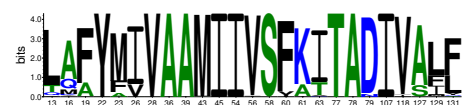

(p) special\_rot bonus: Native

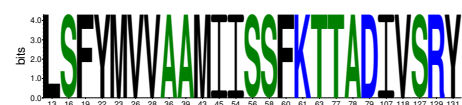

# 11 1LKE

(a) special\_rot bonus: 0.0

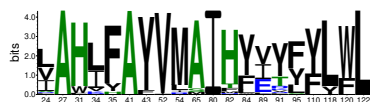

(b) special\_rot bonus: -0.5

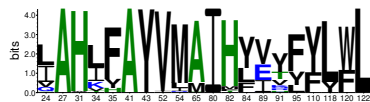

(c) special\_rot bonus: -1.0

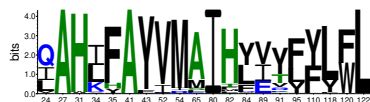

(d) special\_rot bonus: -1.5

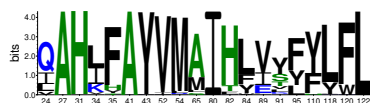

(e) special\_rot bonus: -2.0

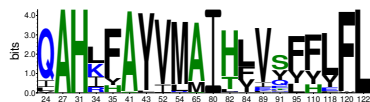

(f) special\_rot bonus: -2.5

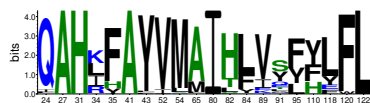

(g) special\_rot bonus: -3.0

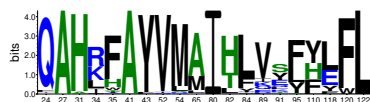

(h) special\_rot bonus: -3.5

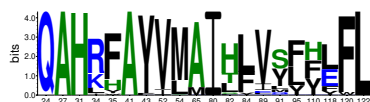

(i) special\_rot bonus: -4.0

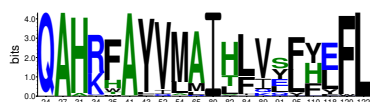

(j) special\_rot bonus: -4.5

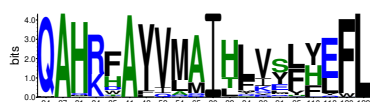

(k) special\_rot bonus: -5.0

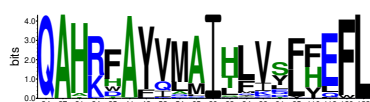

(l) special\_rot bonus: -6.0

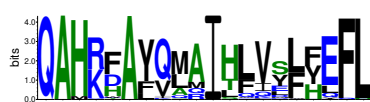

(m) special\_rot bonus: -8.0

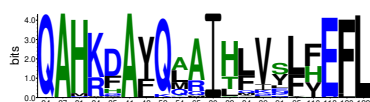

(n) special\_rot bonus: -10.0

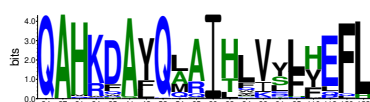

(o) special\_rot bonus: Control

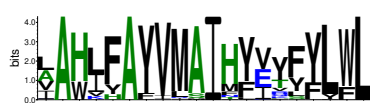

(p) special\_rot bonus: Native

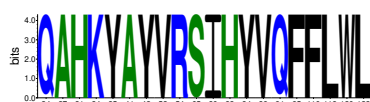

# 12 2XN3

(a) special\_rot bonus: 0.0

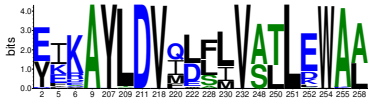

(b) special\_rot bonus: -0.5

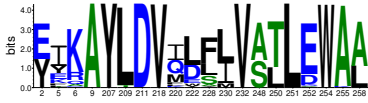

(c) special\_rot bonus: -1.0

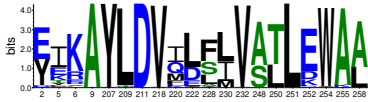

(d) special\_rot bonus: -1.5

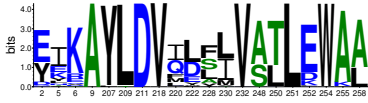

(e) special\_rot bonus: -2.0

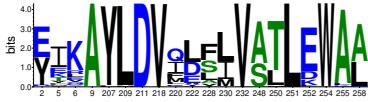

(f) special\_rot bonus: -2.5

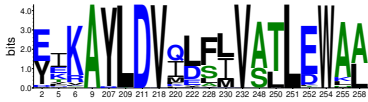

(g) special\_rot bonus: -3.0

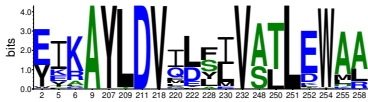

(h) special\_rot bonus: -3.5

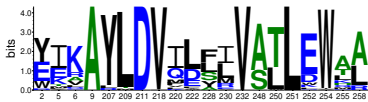

(i) special\_rot bonus: -4.0

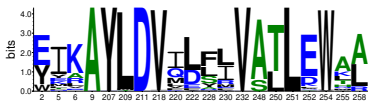

(j) special\_rot bonus: -4.5

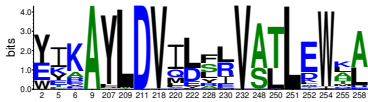

(k) special\_rot bonus: -5.0

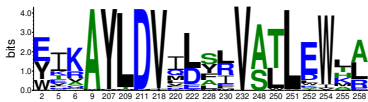

(l) special\_rot bonus: -6.0

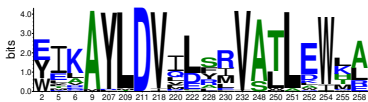

(m) special\_rot bonus: -8.0

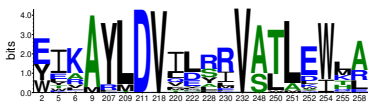

(n) special\_rot bonus: -10.0

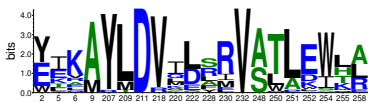

(o) special\_rot bonus: Control

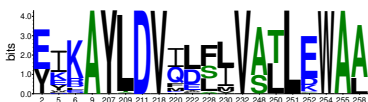

(p) special\_rot bonus: Native

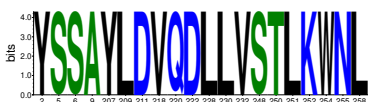

# 13 2QRY

(a) special\_rot bonus: 0.0

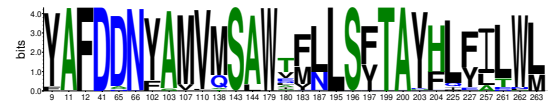

(b) special\_rot bonus: -0.5

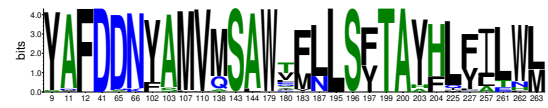

(c) special\_rot bonus: -1.0

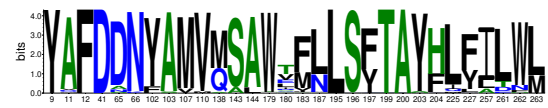

(d) special\_rot bonus: -1.5

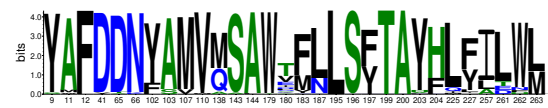

(e) special\_rot bonus: -2.0

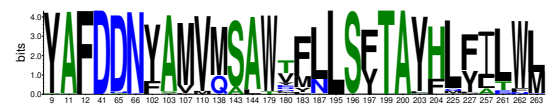

(f) special\_rot bonus: -2.5

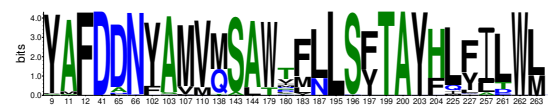

(g) special\_rot bonus: -3.0

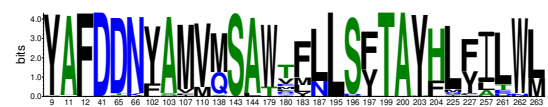

(h) special\_rot bonus: -3.5

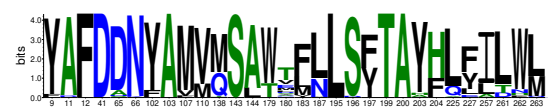

(i) special\_rot bonus: -4.0

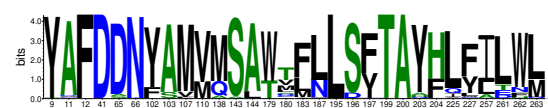

(j) special\_rot bonus: -4.5

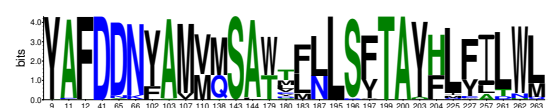

(k) special\_rot bonus: -5.0

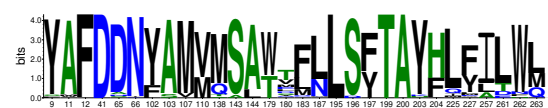

(l) special\_rot bonus: -6.0

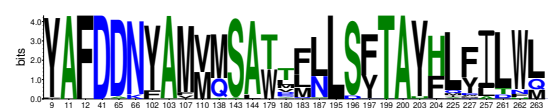

(m) special\_rot bonus: -8.0

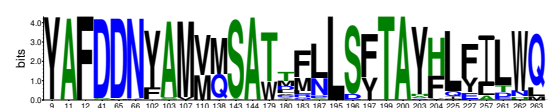

(n) special\_rot bonus: -10.0

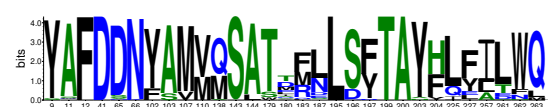

(o) special\_rot bonus: Control

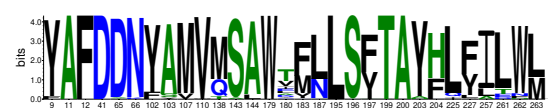

(p) special\_rot bonus: Native

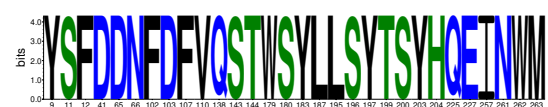



# 14 3OKI

(a) special\_rot bonus: 0.0

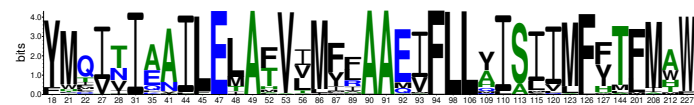

(b) special\_rot bonus: -0.5

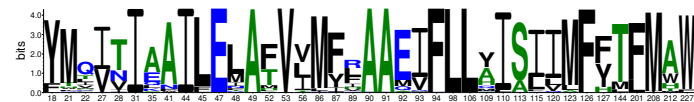

(c) special\_rot bonus: -1.0

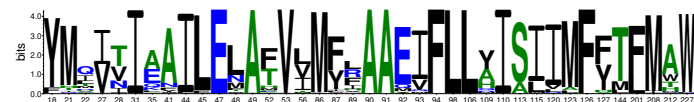

(d) special\_rot bonus: -1.5

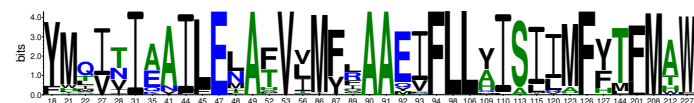

(e) special\_rot bonus: -2.0

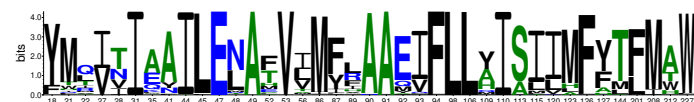

(f) special\_rot bonus: -2.5

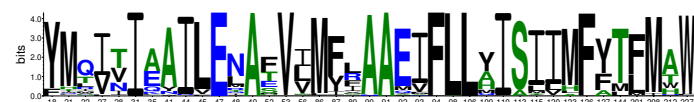

(g) special\_rot bonus: -3.0

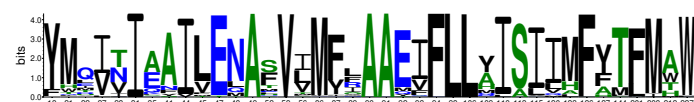

(h) special\_rot bonus: -3.5

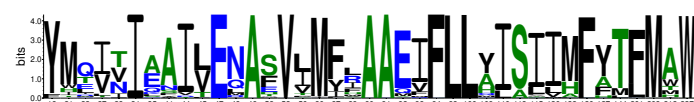

(i) special\_rot bonus: -4.0

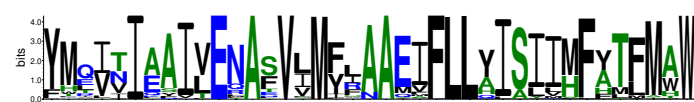

(j) special\_rot bonus: -4.5

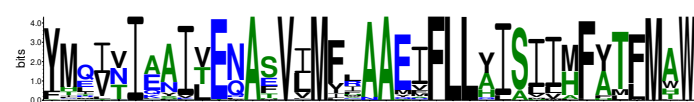

(k) special\_rot bonus: -5.0

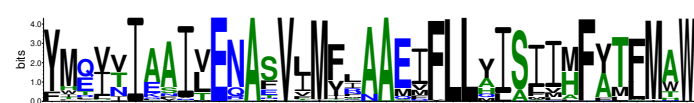

(l) special\_rot bonus: -6.0

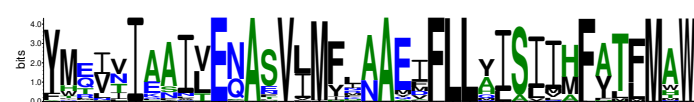

(m) special\_rot bonus: -8.0

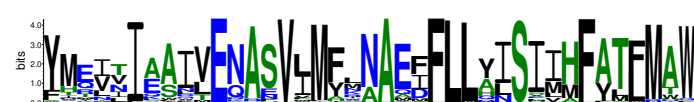

(n) special\_rot bonus: -10.0

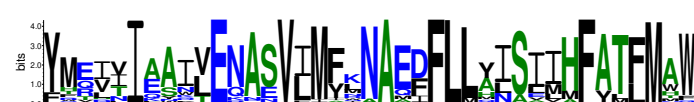

(o) special\_rot bonus: Control

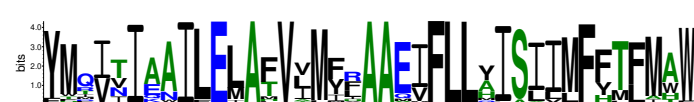

(p) special\_rot bonus: Native

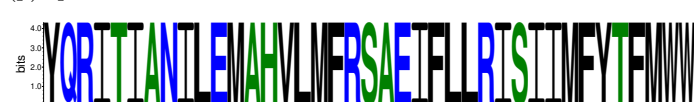

# 15 5HZ6

(a) special\_rot bonus: 0.0

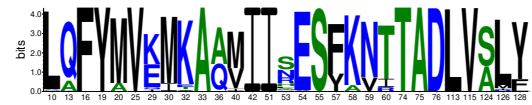

(b) special\_rot bonus: -0.5

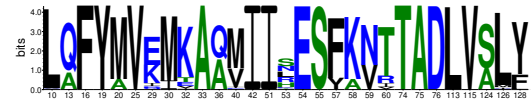

(c) special\_rot bonus: -1.0

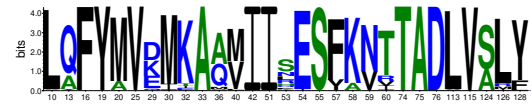

(d) special\_rot bonus: -1.5

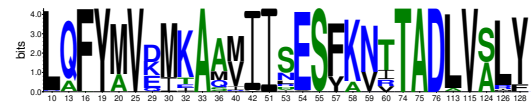

(e) special\_rot bonus: -2.0

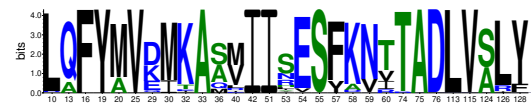

(f) special\_rot bonus: -2.5

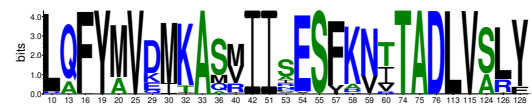

(g) special\_rot bonus: -3.0

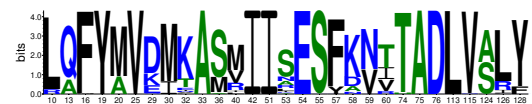

(h) special\_rot bonus: -3.5

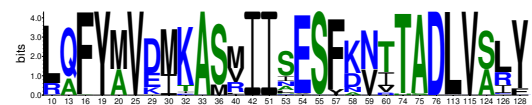

(i) special\_rot bonus: -4.0

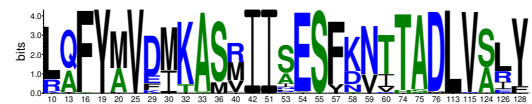

(j) special\_rot bonus: -4.5

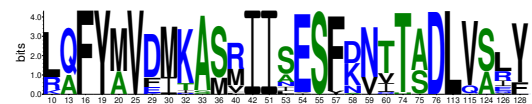

(k) special\_rot bonus: -5.0

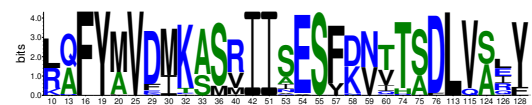

(l) special\_rot bonus: -6.0

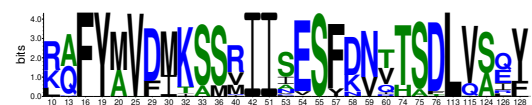

(m) special\_rot bonus: -8.0

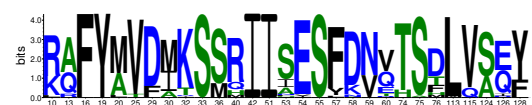

(n) special\_rot bonus: -10.0

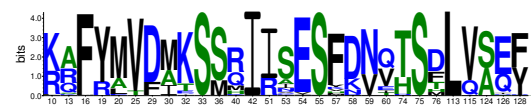

(o) special\_rot bonus: Control

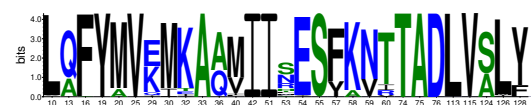

(p) special\_rot bonus: Native

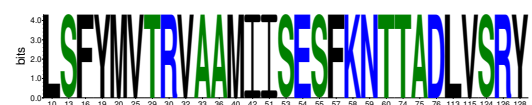

(a) special\_rot bonus: 0.0

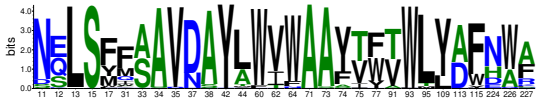

(b) special\_rot bonus: -0.5

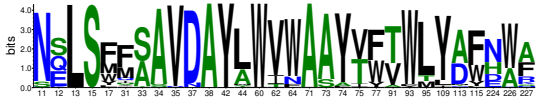

(c) special\_rot bonus: -1.0

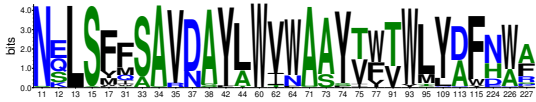

(d) special\_rot bonus: -1.5

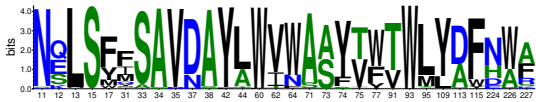

(e) special\_rot bonus: -2.0

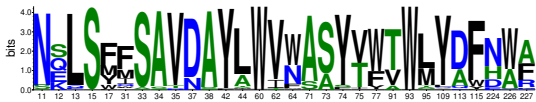

(f) special\_rot bonus: -2.5

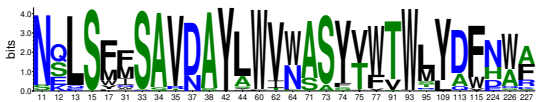

(g) special\_rot bonus: -3.0

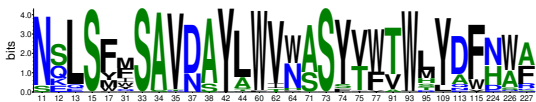

(h) special\_rot bonus: -3.5

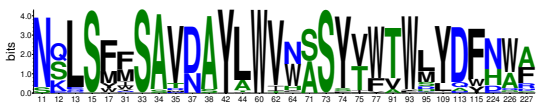

(i) special\_rot bonus: -4.0

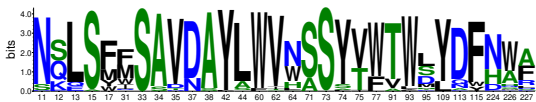

(j) special\_rot bonus: -4.5

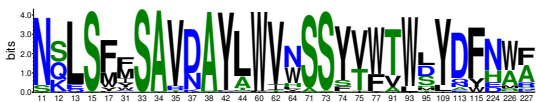

(k) special\_rot bonus: -5.0

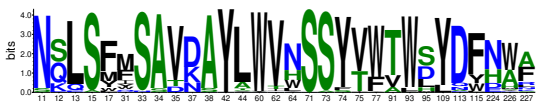

(l) special\_rot bonus: -6.0

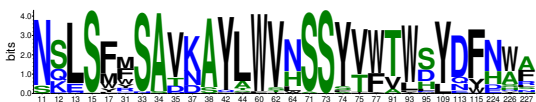

(m) special\_rot bonus: -8.0

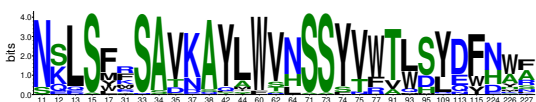

(n) special\_rot bonus: -10.0

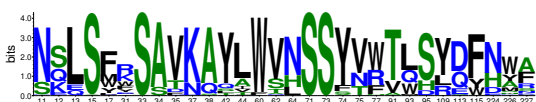

(o) special\_rot bonus: Control

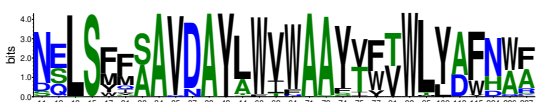

(p) special\_rot bonus: Native

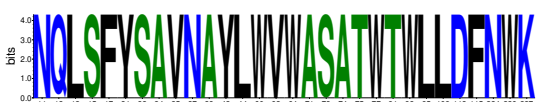

# 17 5T52

(a) special\_rot bonus: 0.0

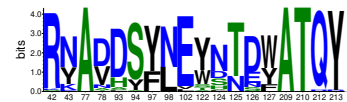

(b) special\_rot bonus: -0.5

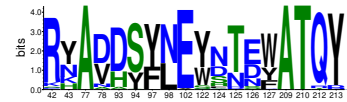

(c) special\_rot bonus: -1.0

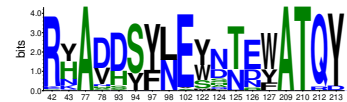

(d) special\_rot bonus: -1.5

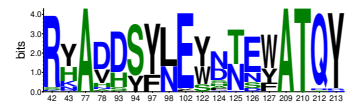

(e) special\_rot bonus: -2.0

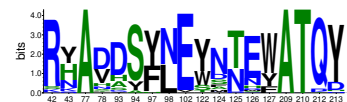

(f) special\_rot bonus: -2.5

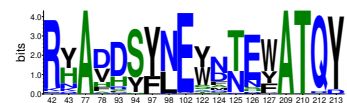

(g) special\_rot bonus: -3.0

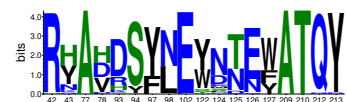

(h) special\_rot bonus: -3.5

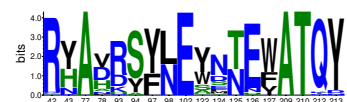

(i) special\_rot bonus: -4.0

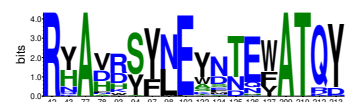

(j) special\_rot bonus: -4.5

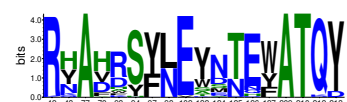

(k) special\_rot bonus: -5.0

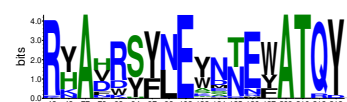

(l) special\_rot bonus: -6.0

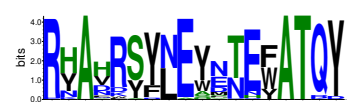

(m) special\_rot bonus: -8.0

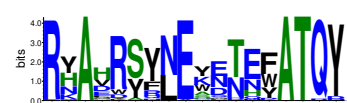

(n) special\_rot bonus: -10.0

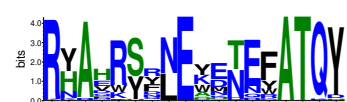

(o) special\_rot bonus: Control

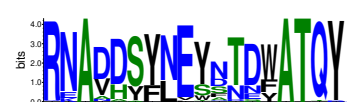

(p) special\_rot bonus: Native

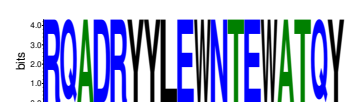

(a) special\_rot bonus: 0.0

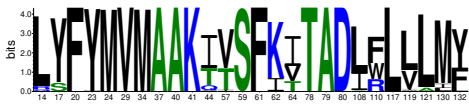

(b) special\_rot bonus: -0.5

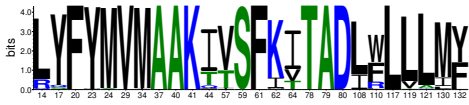

(c) special\_rot bonus: -1.0

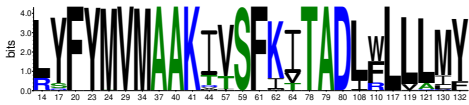

(d) special\_rot bonus: -1.5

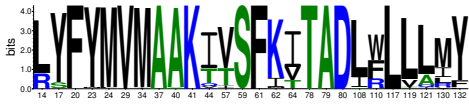

(e) special\_rot bonus: -2.0

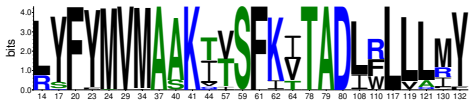

(f) special\_rot bonus: -2.5

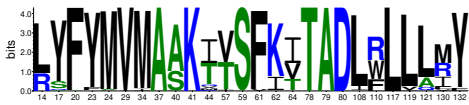

(g) special\_rot bonus: -3.0

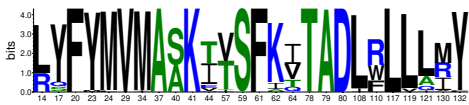

(h) special\_rot bonus: -3.5

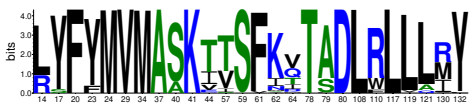

(i) special\_rot bonus: -4.0

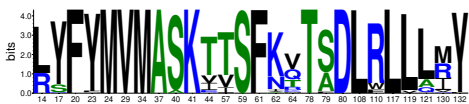

(j) special\_rot bonus: -4.5

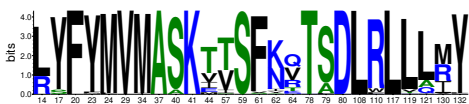

(k) special\_rot bonus: -5.0

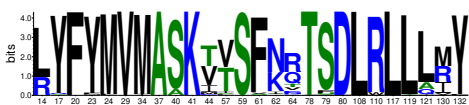

(l) special\_rot bonus: -6.0

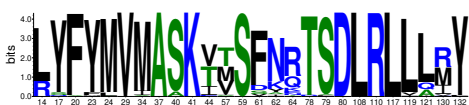

(m) special\_rot bonus: -8.0

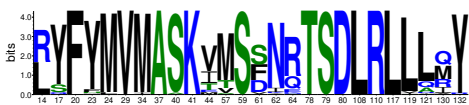

(n) special\_rot bonus: -10.0

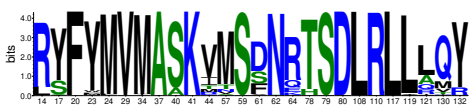

(o) special\_rot bonus: Control

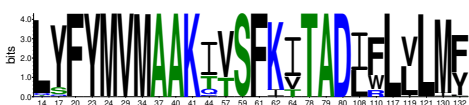

(p) special\_rot bonus: Native

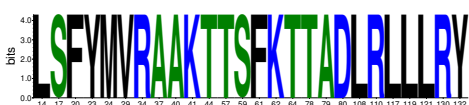



# 19 1TOU

(a) special\_rot bonus: 0.0

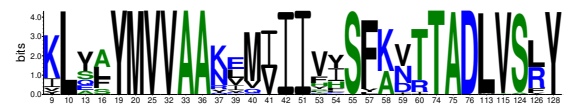

(b) special\_rot bonus: -0.5

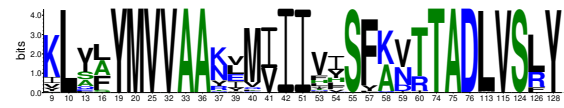

(c) special\_rot bonus: -1.0

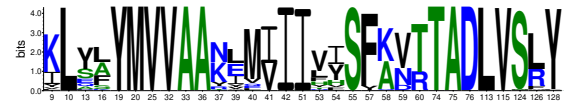

(d) special\_rot bonus: -1.5

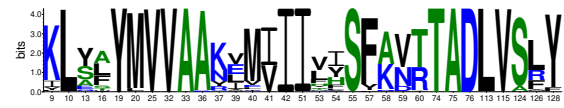

(e) special\_rot bonus: -2.0

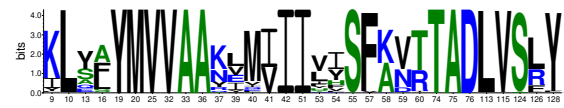

(f) special\_rot bonus: -2.5

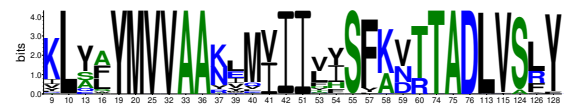

(g) special\_rot bonus: -3.0

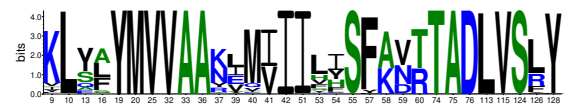

(h) special\_rot bonus: -3.5

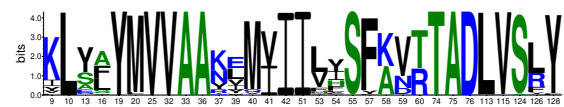

(i) special\_rot bonus: -4.0

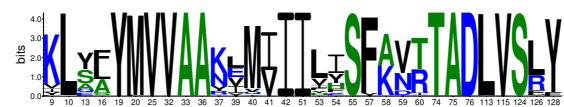

(j) special\_rot bonus: -4.5

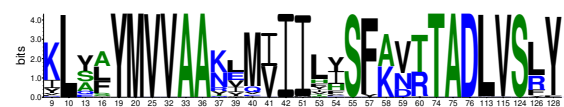

(k) special\_rot bonus: -5.0

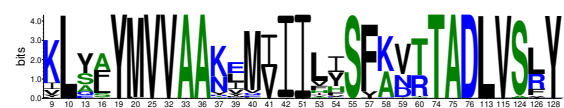

(l) special\_rot bonus: -6.0

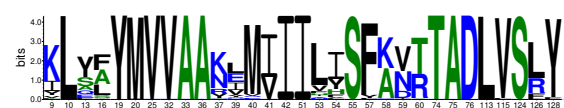

(m) special\_rot bonus: -8.0

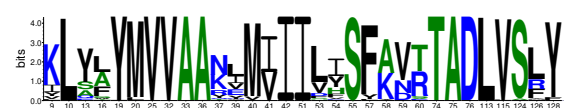

(n) special\_rot bonus: -10.0

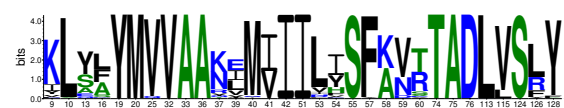

(o) special\_rot bonus: Control

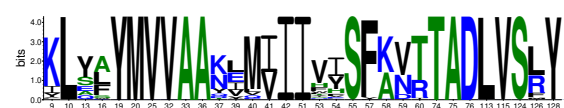

(p) special\_rot bonus: Native

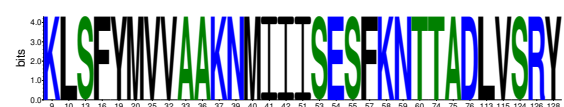



(a) special\_rot bonus: 0.0

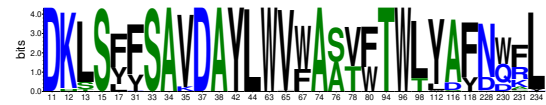

(b) special\_rot bonus: -0.5

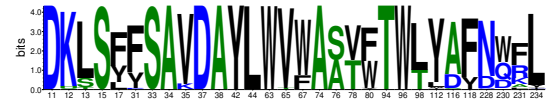

(c) special\_rot bonus: -1.0

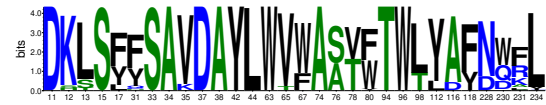

(d) special\_rot bonus: -1.5

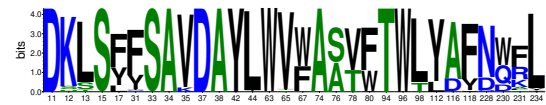

(e) special\_rot bonus: -2.0

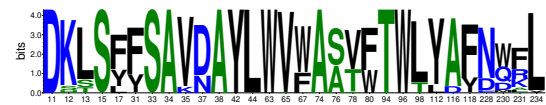

(f) special\_rot bonus: -2.5

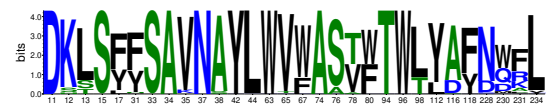

(g) special\_rot bonus: -3.0

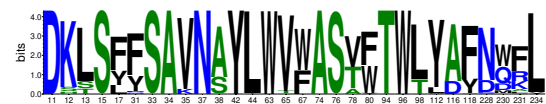

(h) special\_rot bonus: -3.5

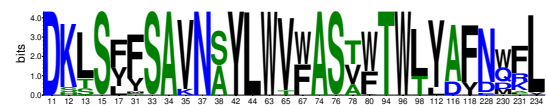

(i) special\_rot bonus: -4.0

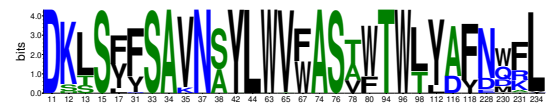

(j) special\_rot bonus: -4.5

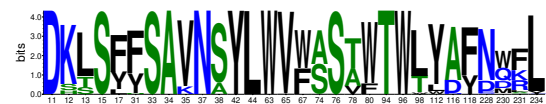

(k) special\_rot bonus: -5.0

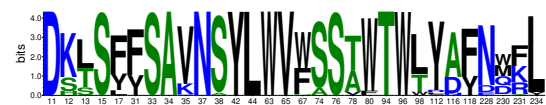

(l) special\_rot bonus: -6.0

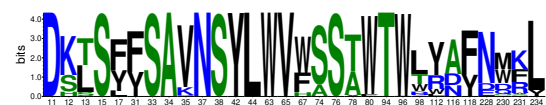

(m) special\_rot bonus: -8.0

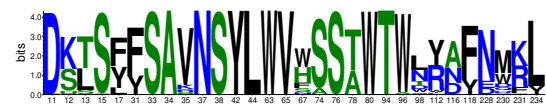

(n) special\_rot bonus: -10.0

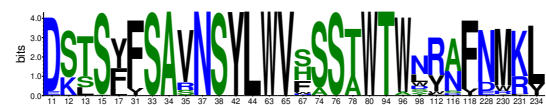

(o) special\_rot bonus: Control

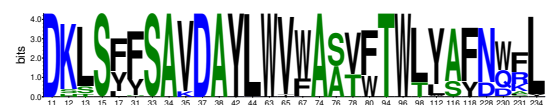

(p) special\_rot bonus: Native

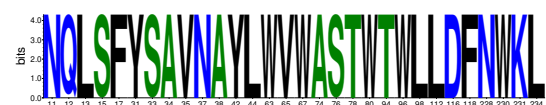

## 21 4AFG

(a) special\_rot bonus: 0.0

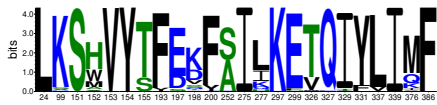

(b) special\_rot bonus: -0.5

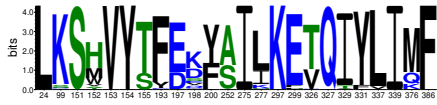

(c) special\_rot bonus: -1.0

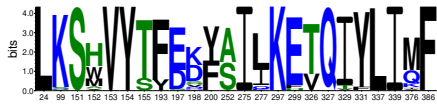

(d) special\_rot bonus: -1.5

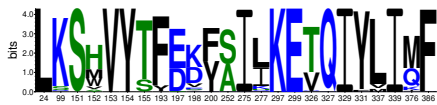

(e) special\_rot bonus: -2.0

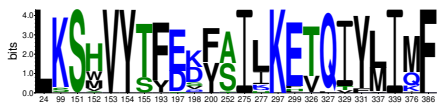

(f) special\_rot bonus: -2.5

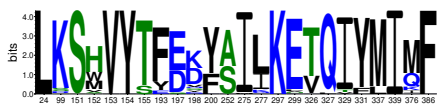

(g) special\_rot bonus: -3.0

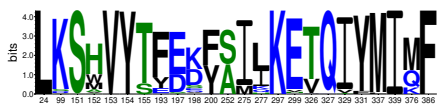

(h) special\_rot bonus: -3.5

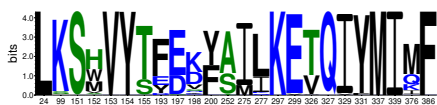

(i) special\_rot bonus: -4.0

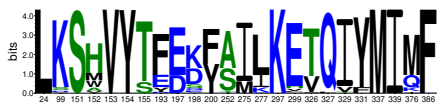

(j) special\_rot bonus: -4.5

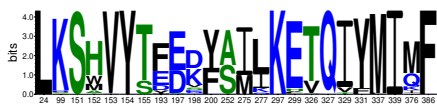

(k) special\_rot bonus: -5.0

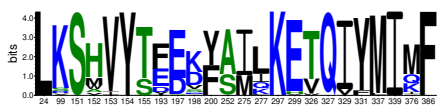

(l) special\_rot bonus: -6.0

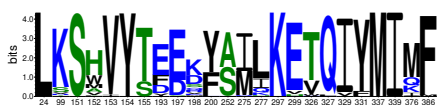

(m) special\_rot bonus: -8.0

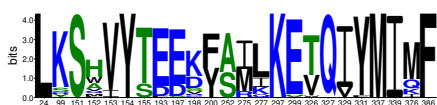

(n) special\_rot bonus: -10.0

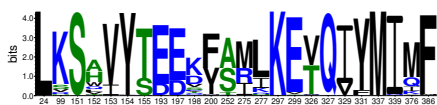

(o) special\_rot bonus: Control

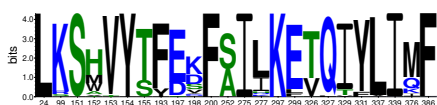

(p) special\_rot bonus: Native

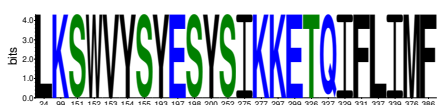

Supplement: pcbi.1008178.s005.pdf [file pcbi.1008178.s005.pdf]
