# Supplementary material for: New computational protein design methods for de novo small molecule binding sites
Source: PubMed Central journal article supplement (PMC7575090; doi:10.1371/journal.pcbi.1008178), 2020-10-05

# Design Metric Gridplots

## Contents

|    |                                      |    |
|----|--------------------------------------|----|
| 1  | UM_1_F153W228W36_40_2fnc_11_LFN_0001 | 2  |
| 2  | UM_1_F24W123M71_84_2owpA_LFN_0001    | 3  |
| 3  | UM_1_F51F138Y33_204_3gzbA_IM4_0002   | 4  |
| 4  | UM_1_F74V71F18_5_1q40A_ATZ_0018      | 5  |
| 5  | UM_1_K104F89F60_244_1tuhA_IBP_0019   | 6  |
| 6  | UM_1_L11W14F18_9_1tp6A_ATZ_0022      | 7  |
| 7  | UM_1_L21W41F124_2_1z1sA_IM4_0017     | 8  |
| 8  | UM_1_L27L98L132_127_1jkgA_IM4_0007   | 9  |
| 9  | UM_1_L27L98L132_174_1jkgA_IM4_0007   | 10 |
| 10 | UM_1_R260W12W155_35_1jvx_11_IBP_0007 | 11 |
| 11 | UM_1_R32I12V51_90_3ecfA_IBP_0004     | 12 |
| 12 | UM_1_R93W62Y38_39_3gzsA_NPS_0005     | 13 |
| 13 | UM_1_W27Y49F124_122_2rcdA_NPS_0005   | 14 |
| 14 | UM_1_Y49W60L53_146_3er7B_DOG_0001    | 15 |
| 15 | UM_2_F146V133M65_3_3emm_11_IM4_0018  | 16 |

# 1 UM\_1\_F153W228W36\_40\_2fnc\_11\_LFN\_0001

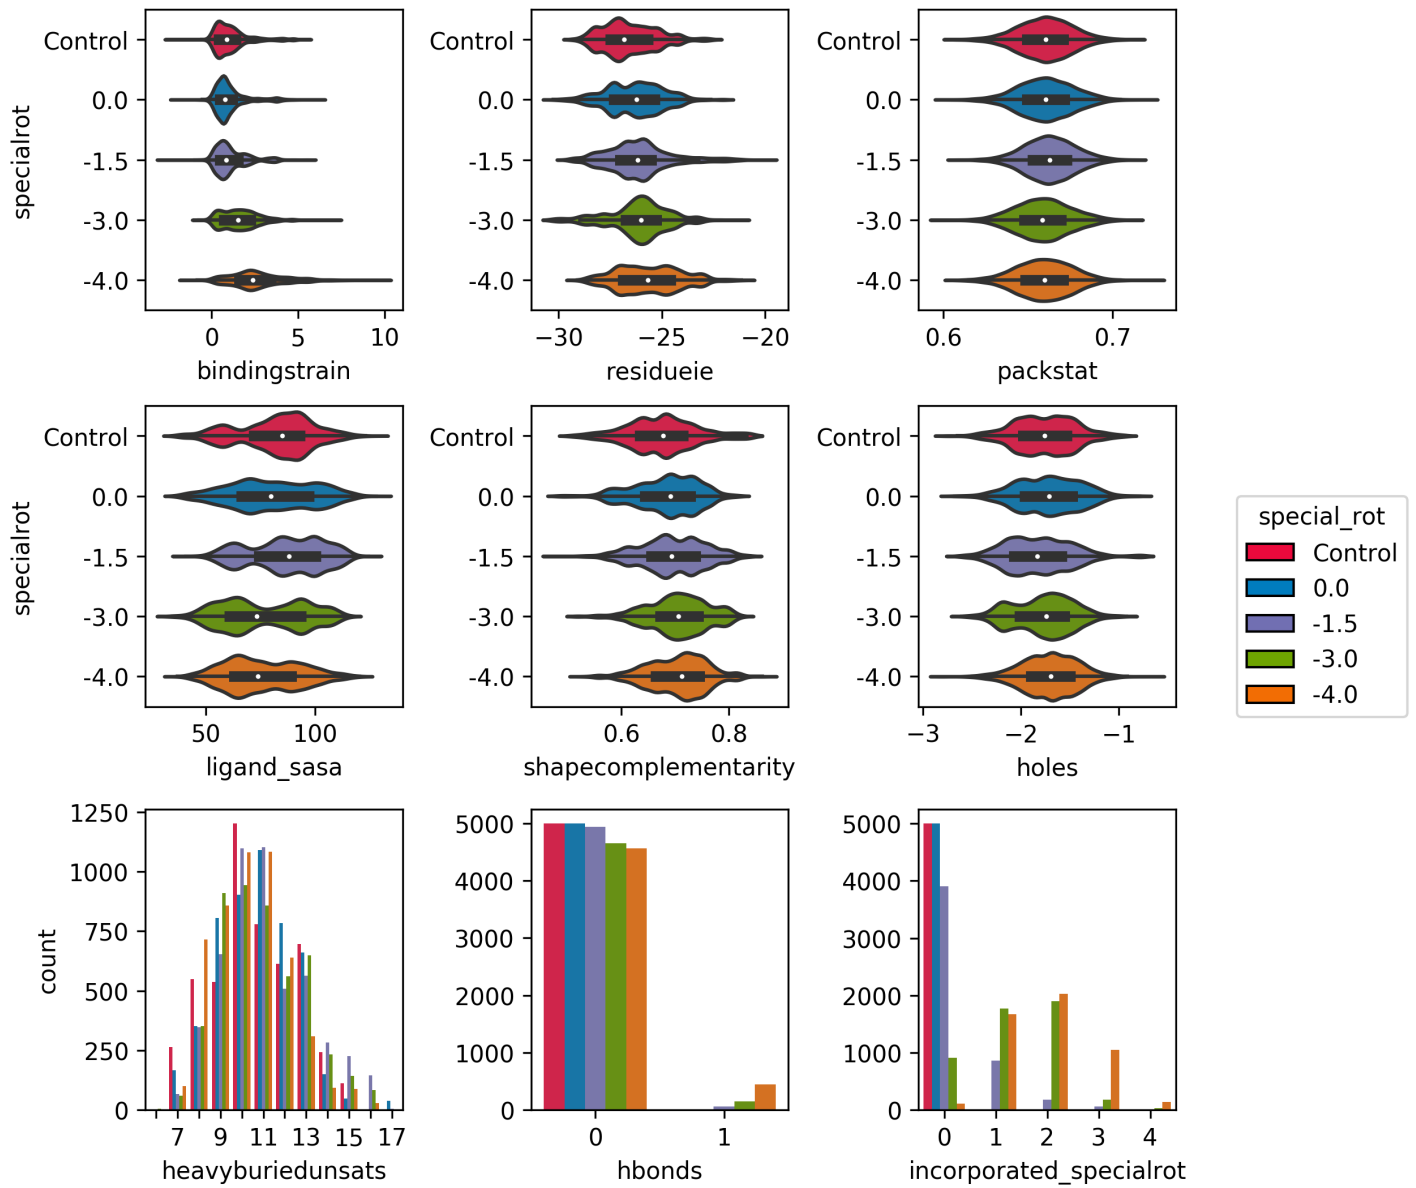

## 2 UM\_1\_F24W123M71\_84\_2owpA\_LFN\_0001

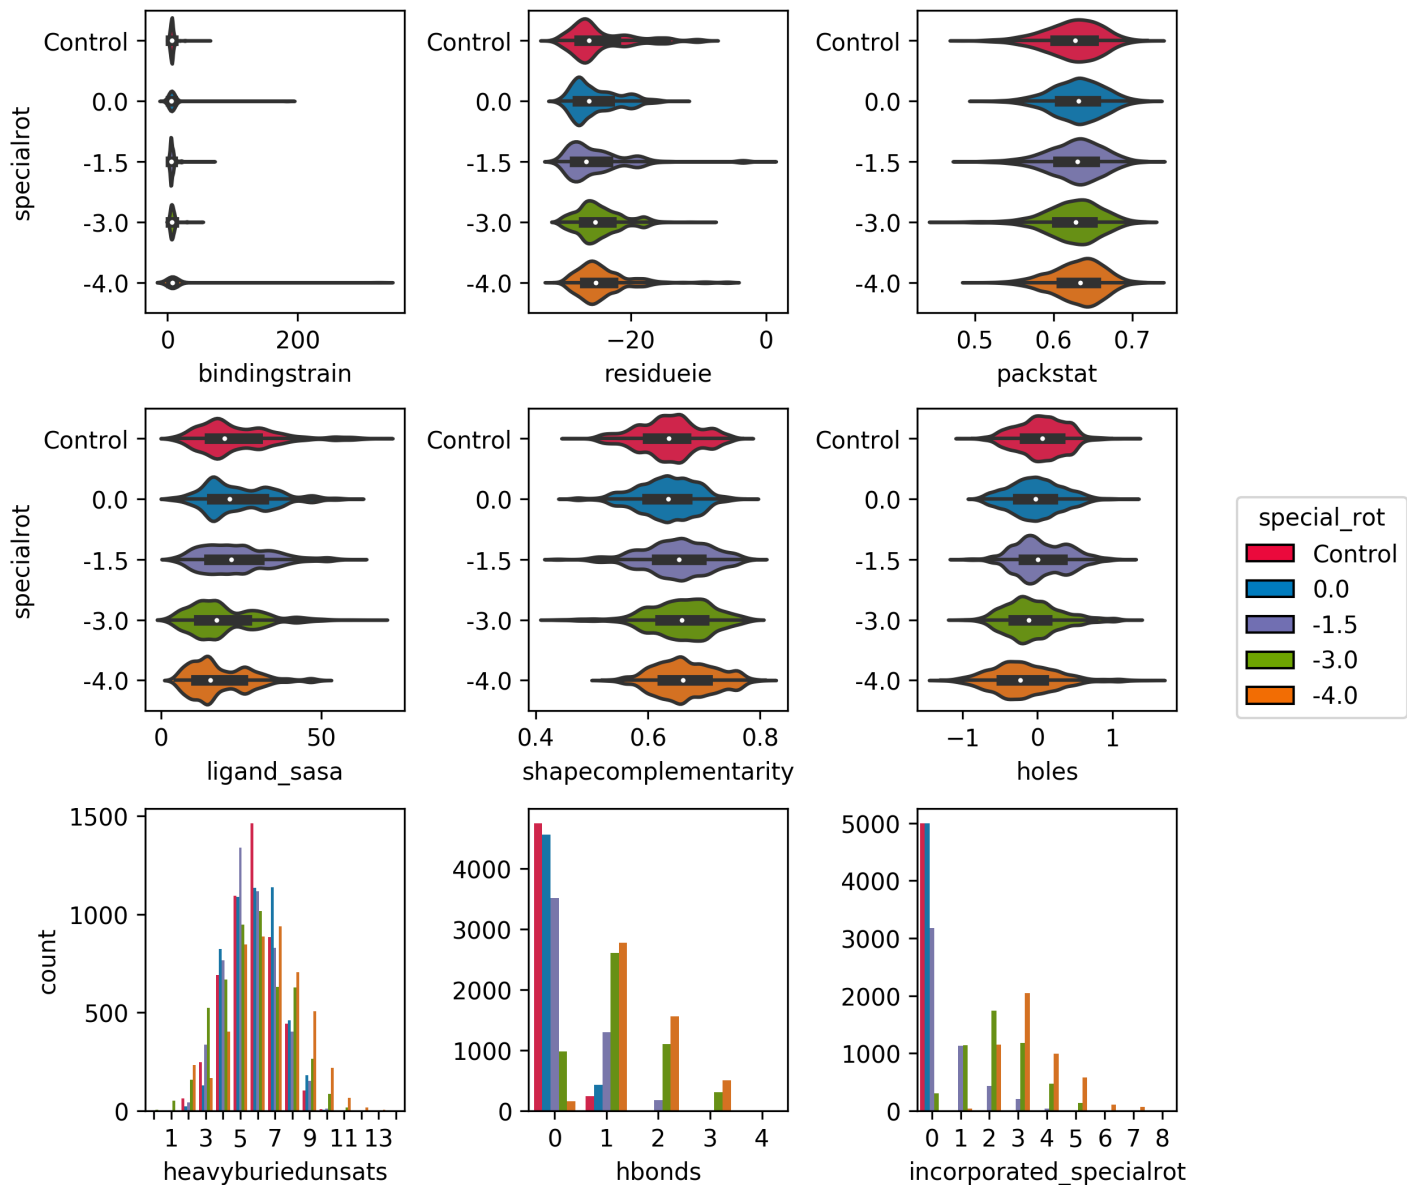

### 3 UM\_1\_F51F138Y33\_204\_3gzbA\_IM4\_0002

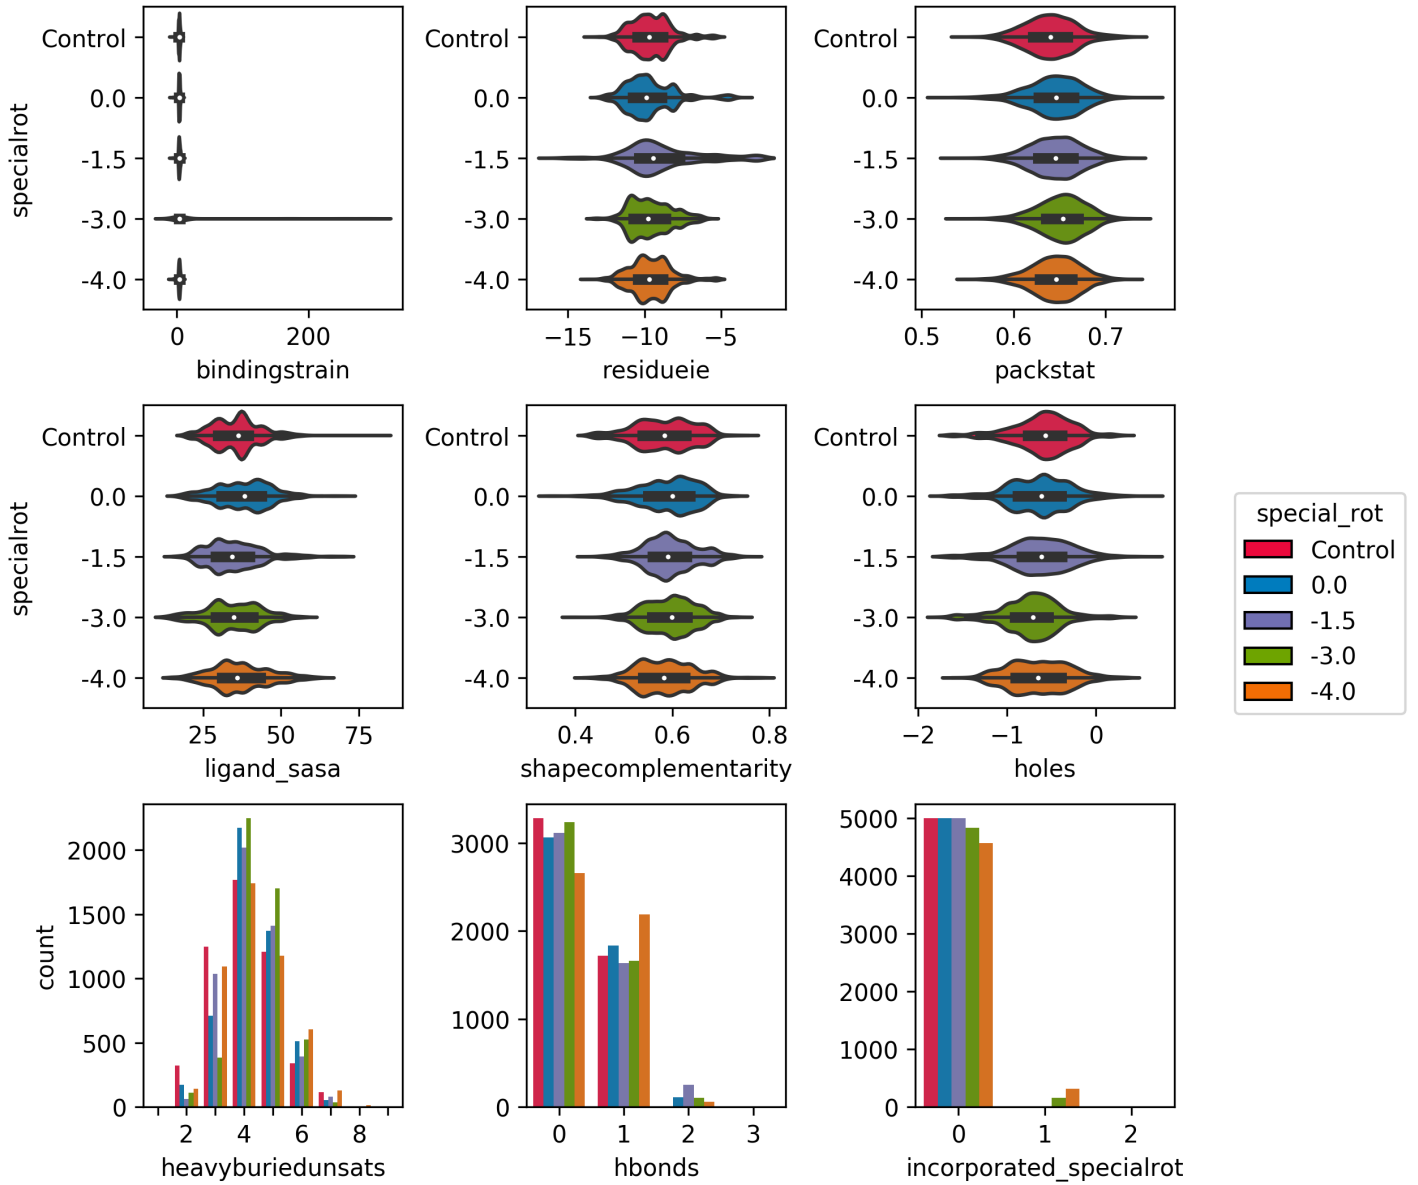

# 4 UM\_1\_F74V71F18\_5\_1q40A\_ATZ\_0018

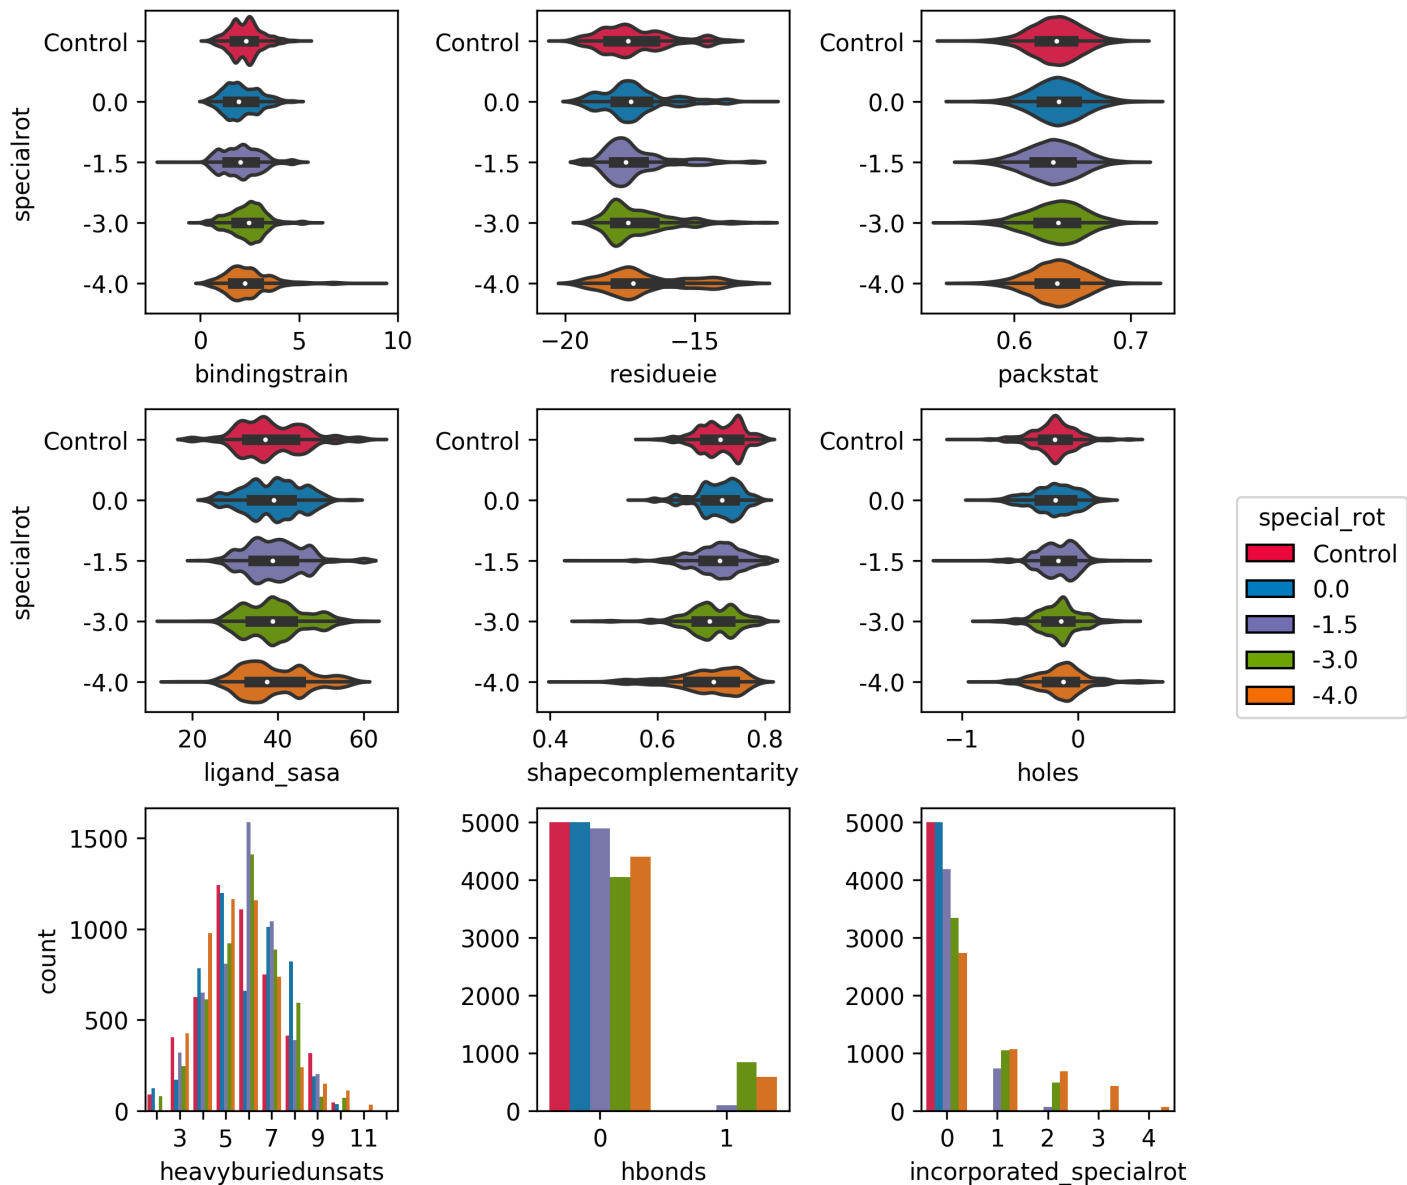

# 5 UM\_1\_K104F89F60\_244\_1tuhA\_IBP\_0019

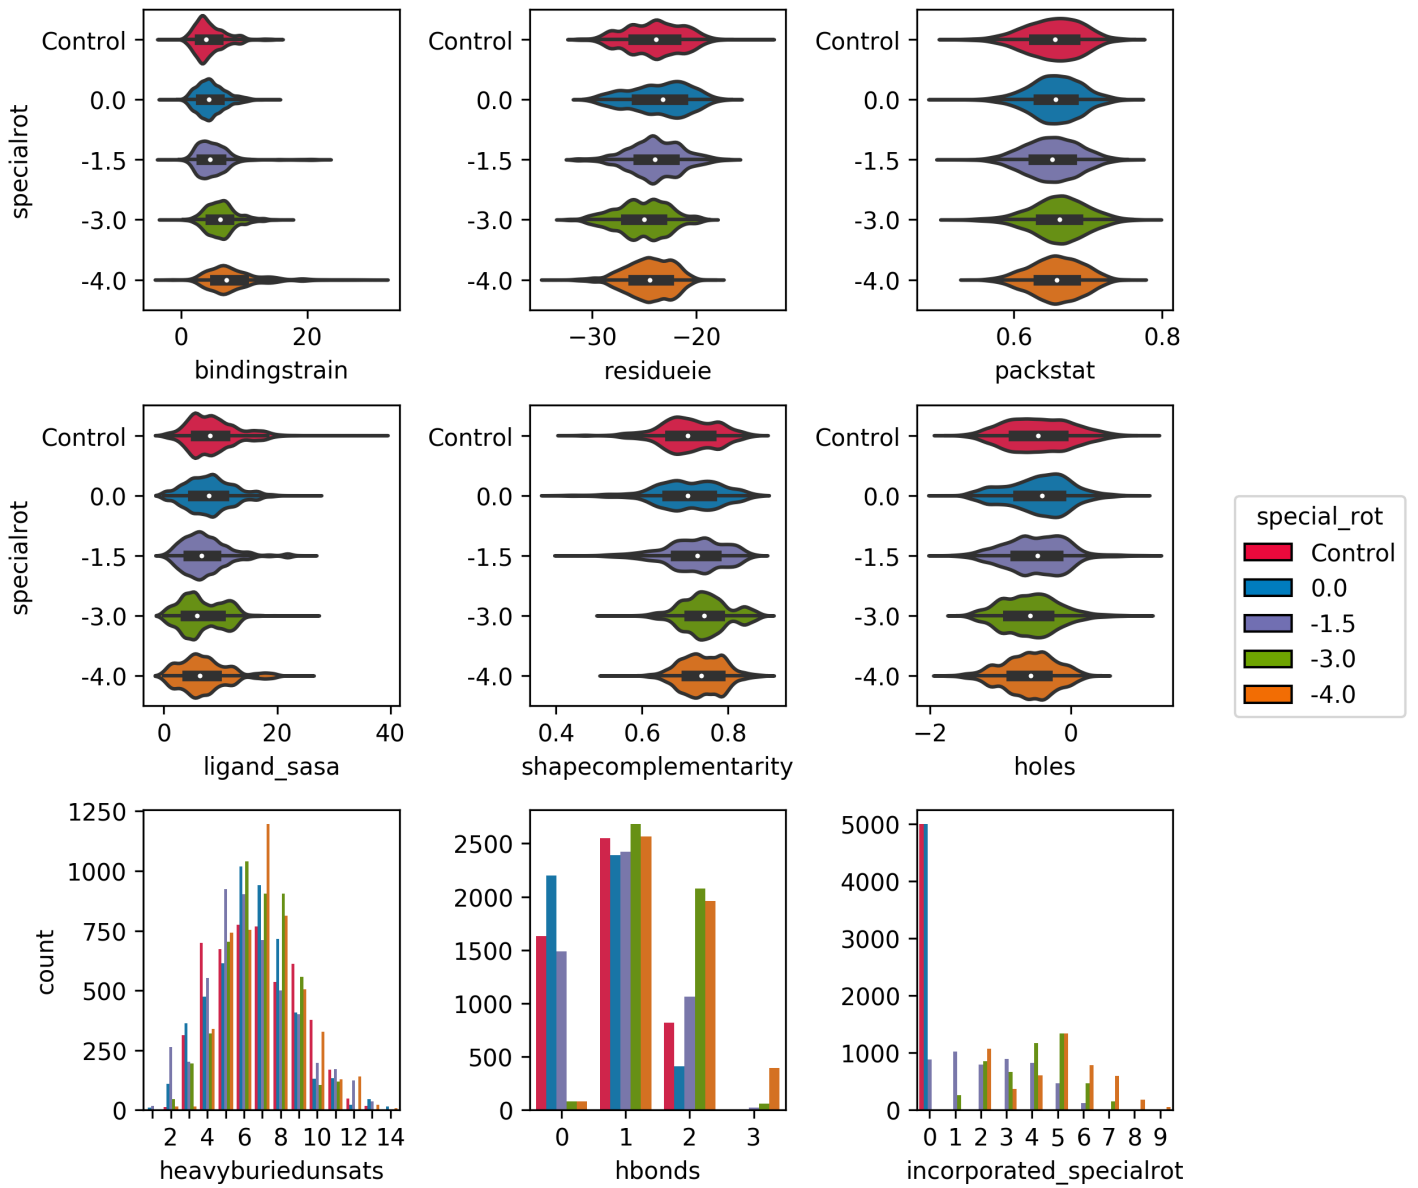

## 6 UM\_1\_L11W14F18\_9\_1tp6A\_ATZ\_0022

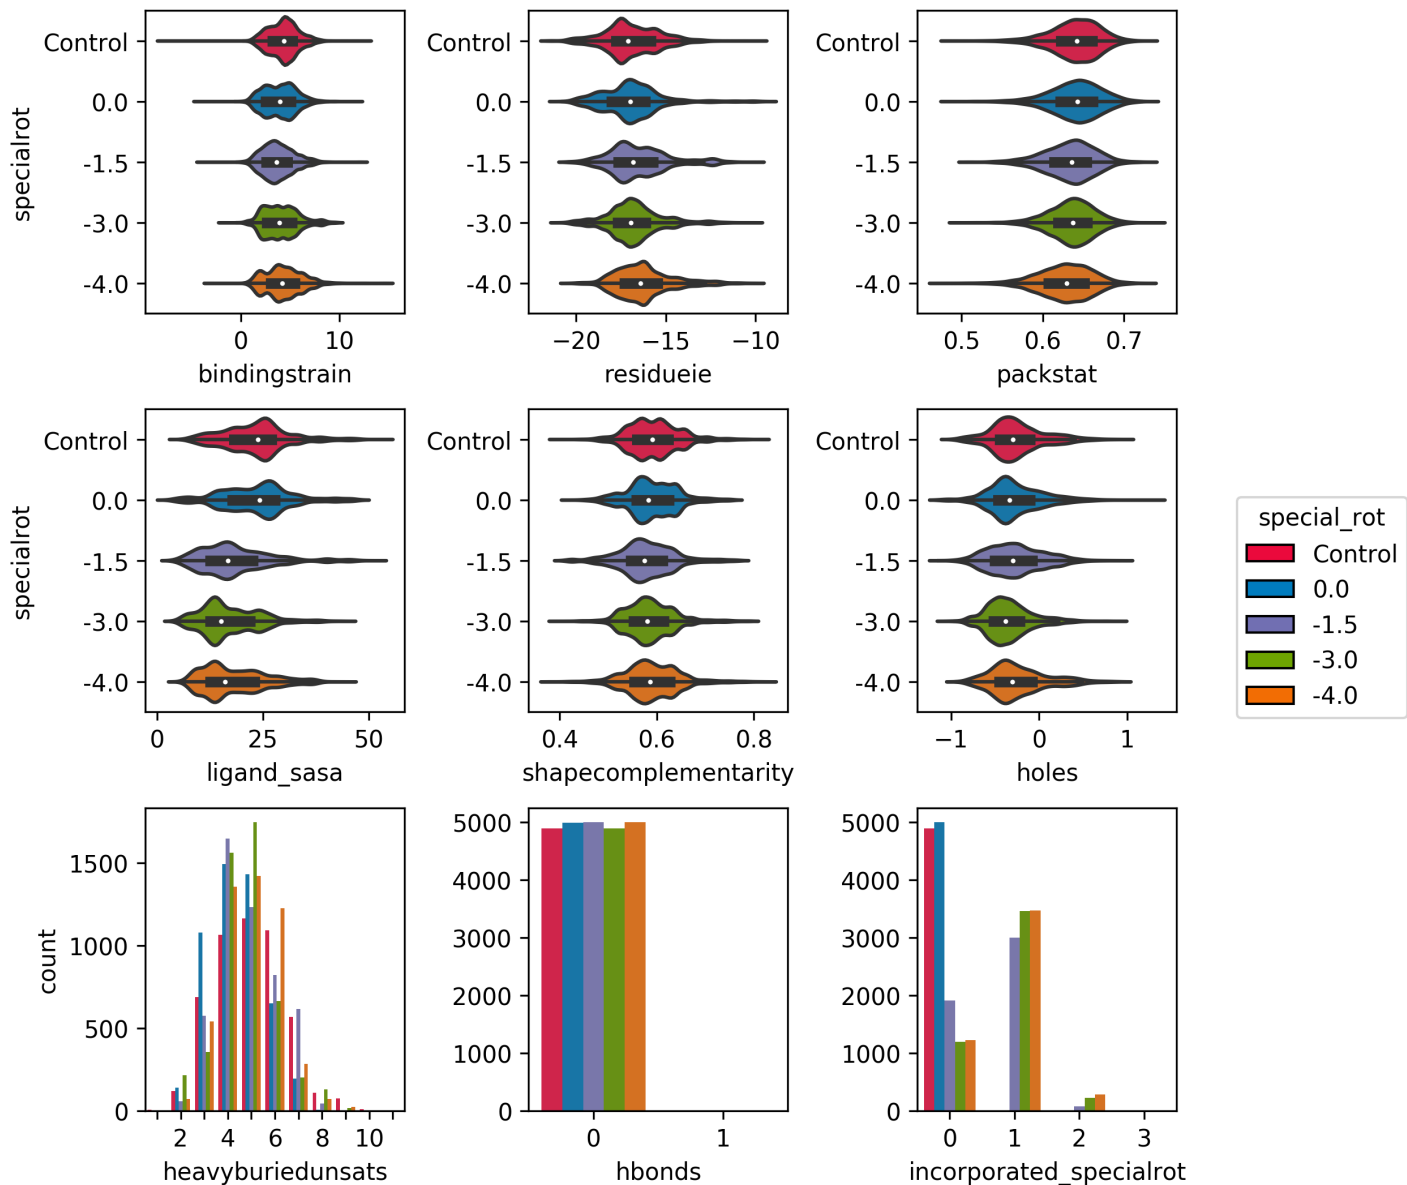

# 7 UM\_1\_L21W41F124\_2\_1z1sA\_IM4\_0017

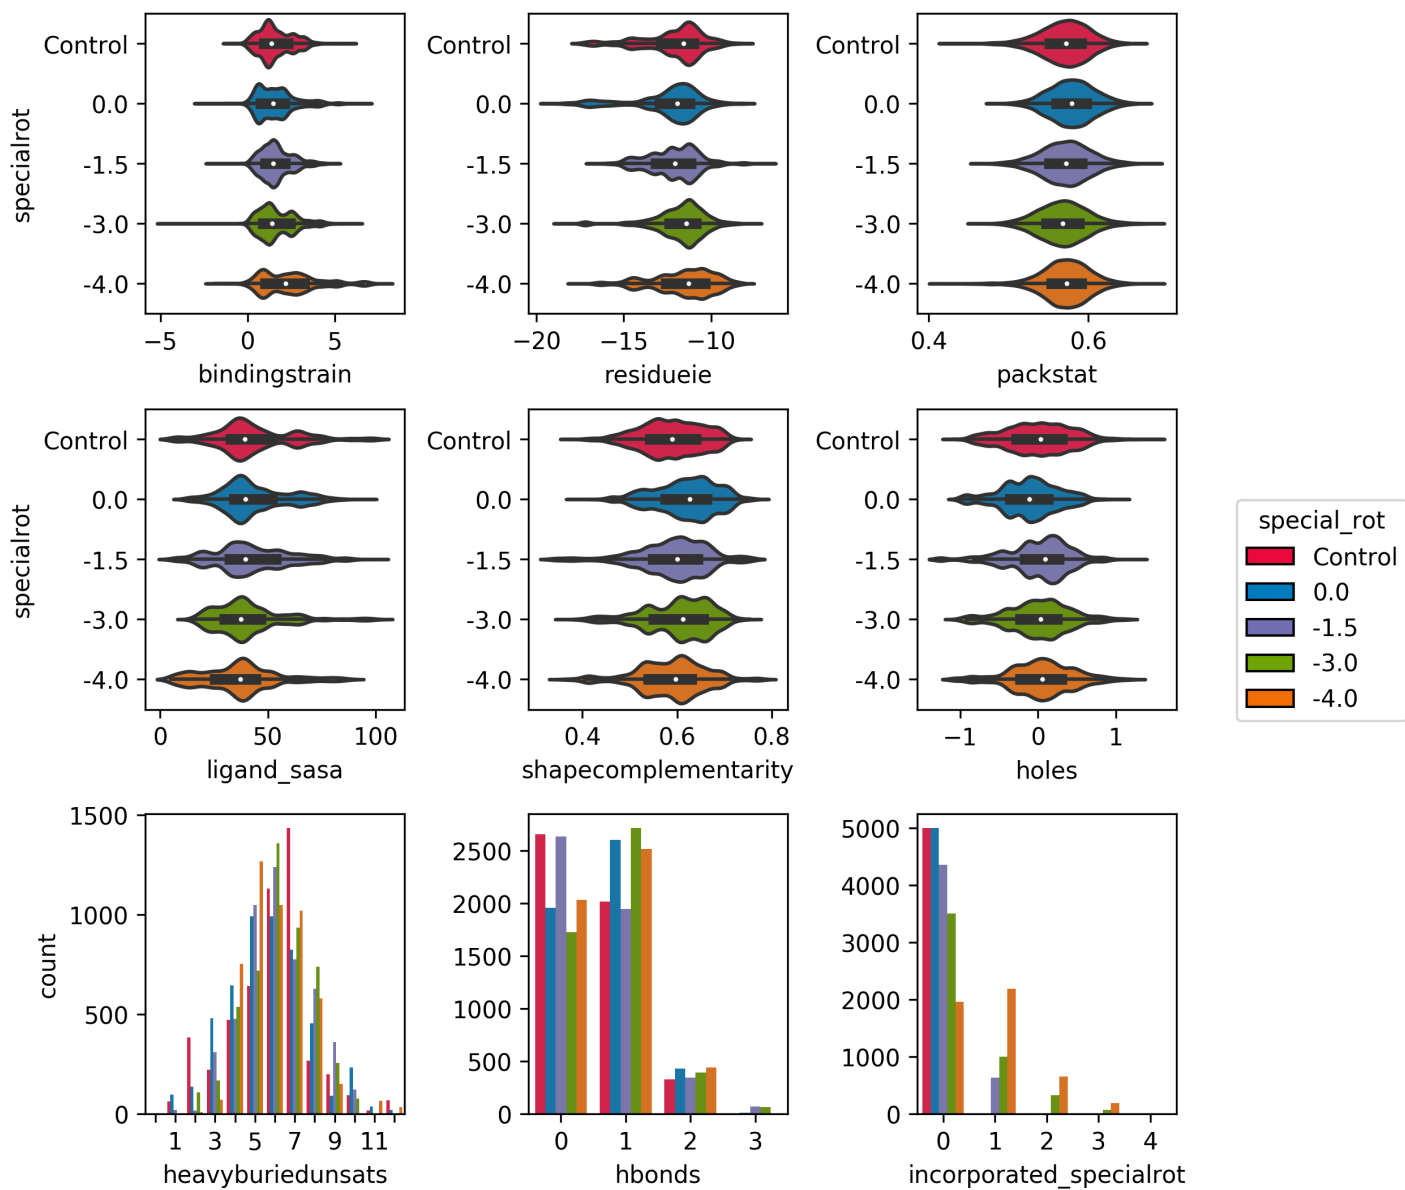



# 8 UM\_1\_L27L98L132\_127\_1jkgA\_IM4\_0007

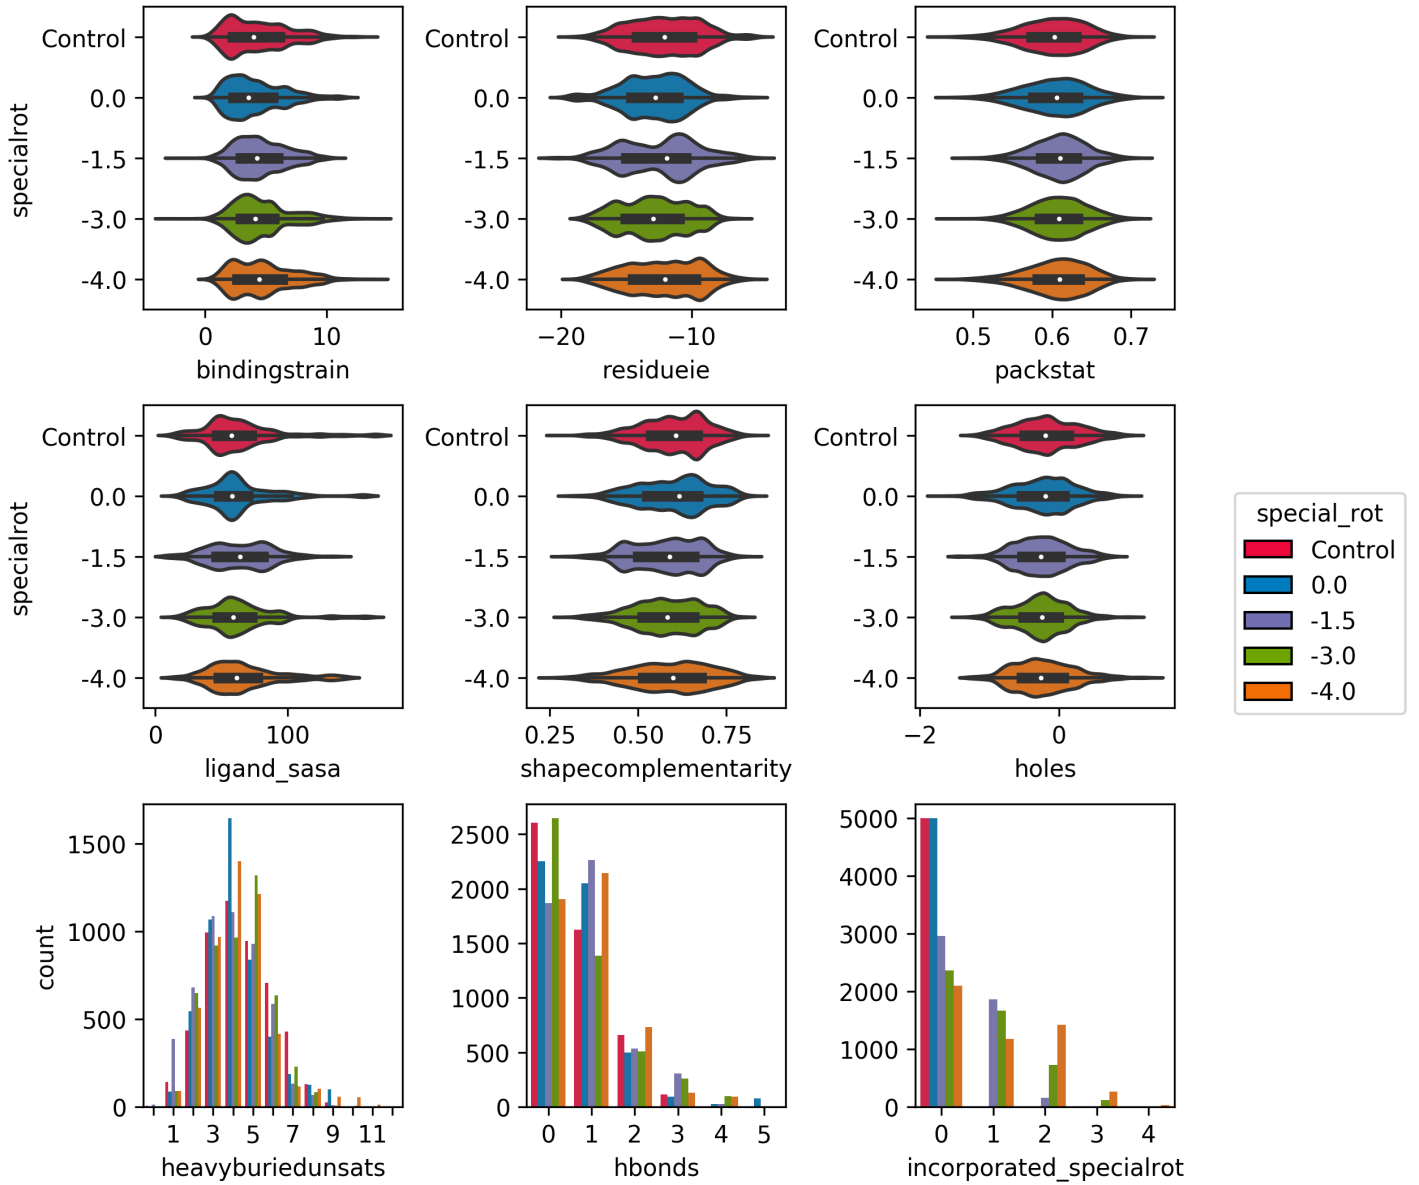

# 9 UM\_1\_L27L98L132\_174\_1jkgA\_IM4\_0007

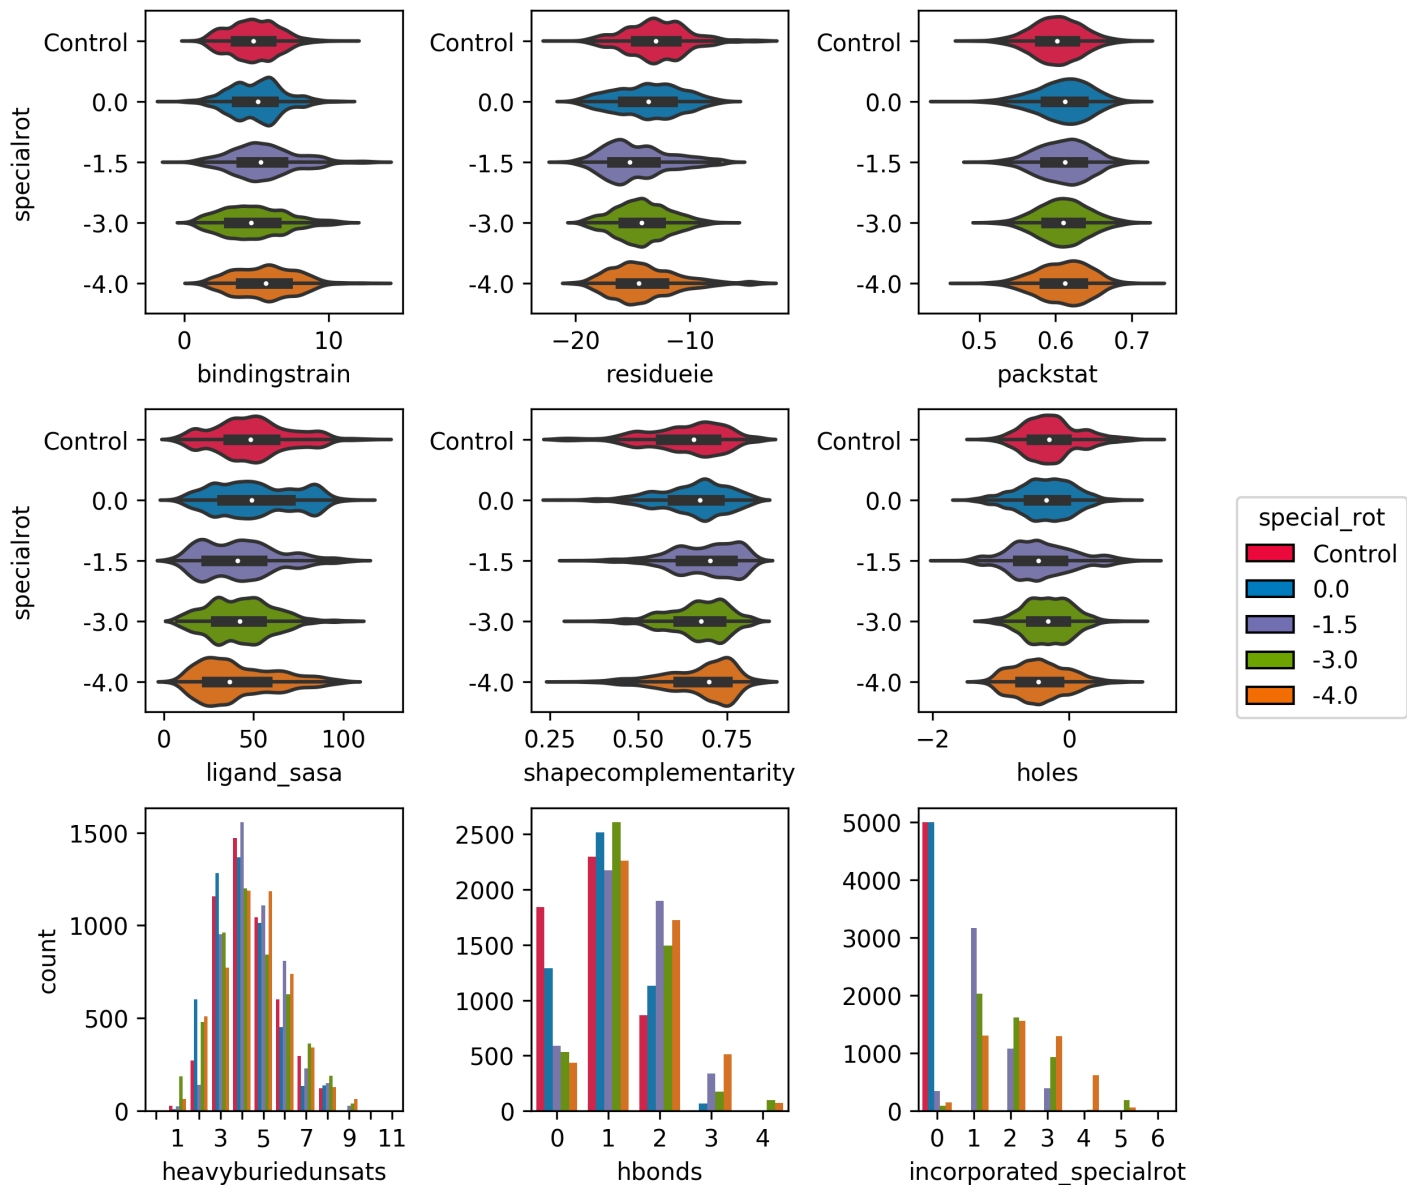

10 UM\_1\_R260W12W155\_35\_1jvx\_11\_IBP\_0007

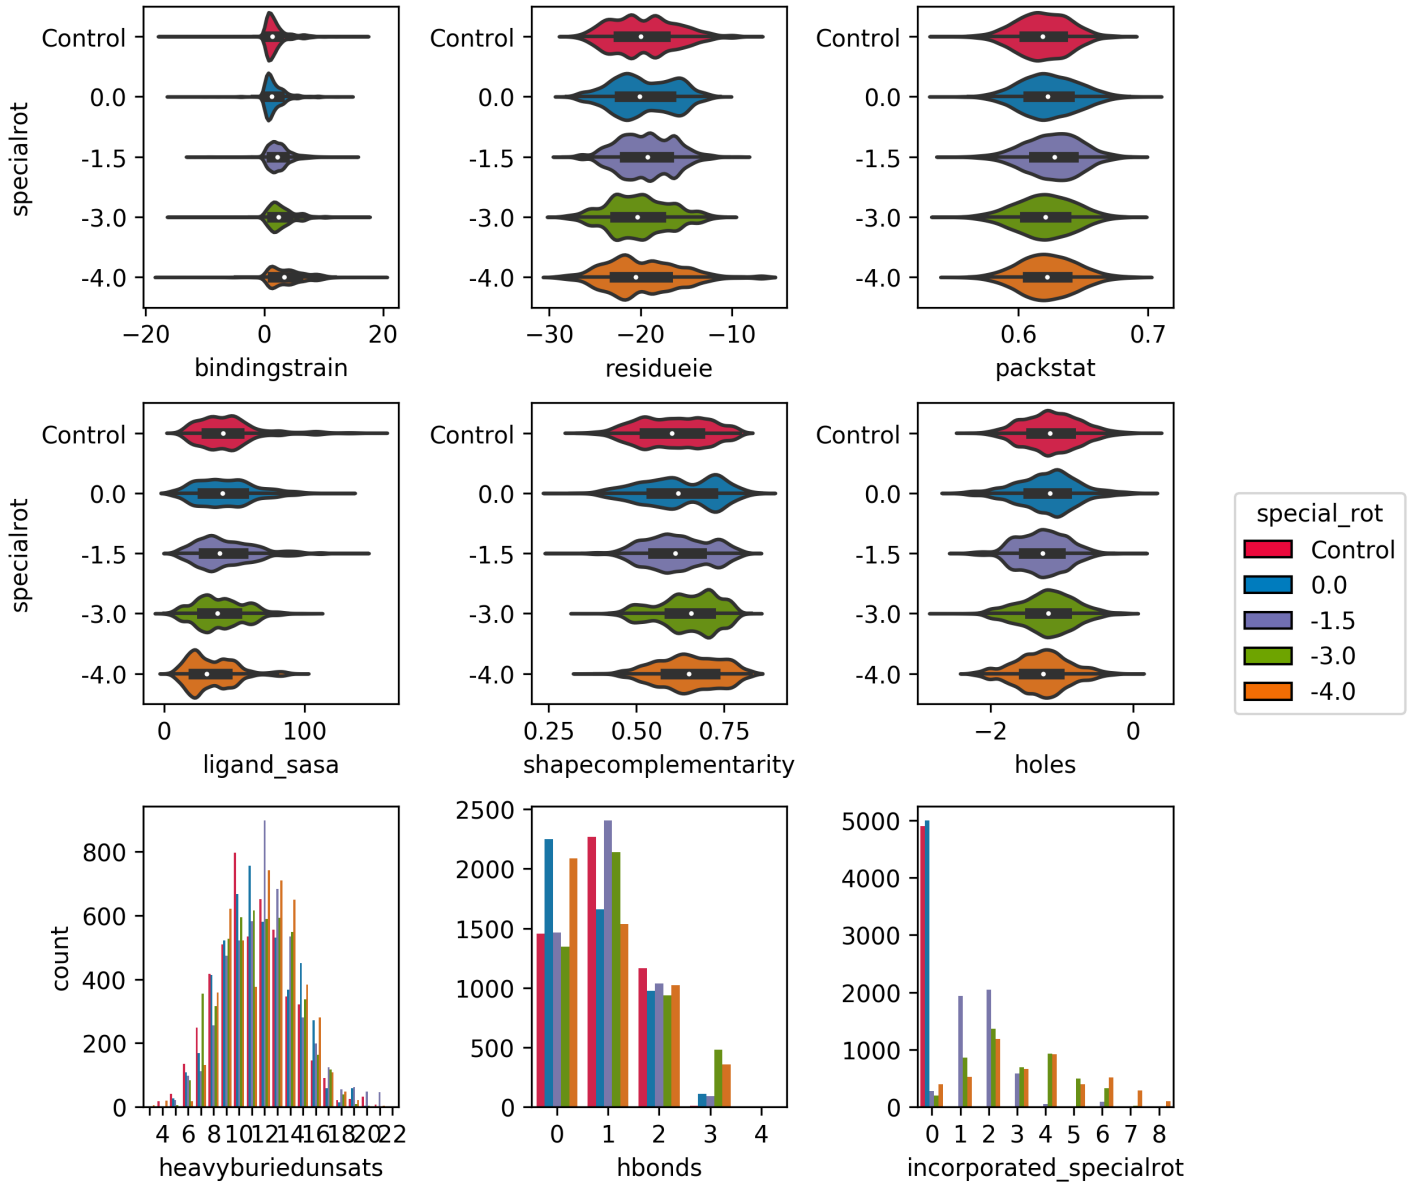

# 11 UM\_1\_R32I12V51\_90\_3ecfA\_IBP\_0004

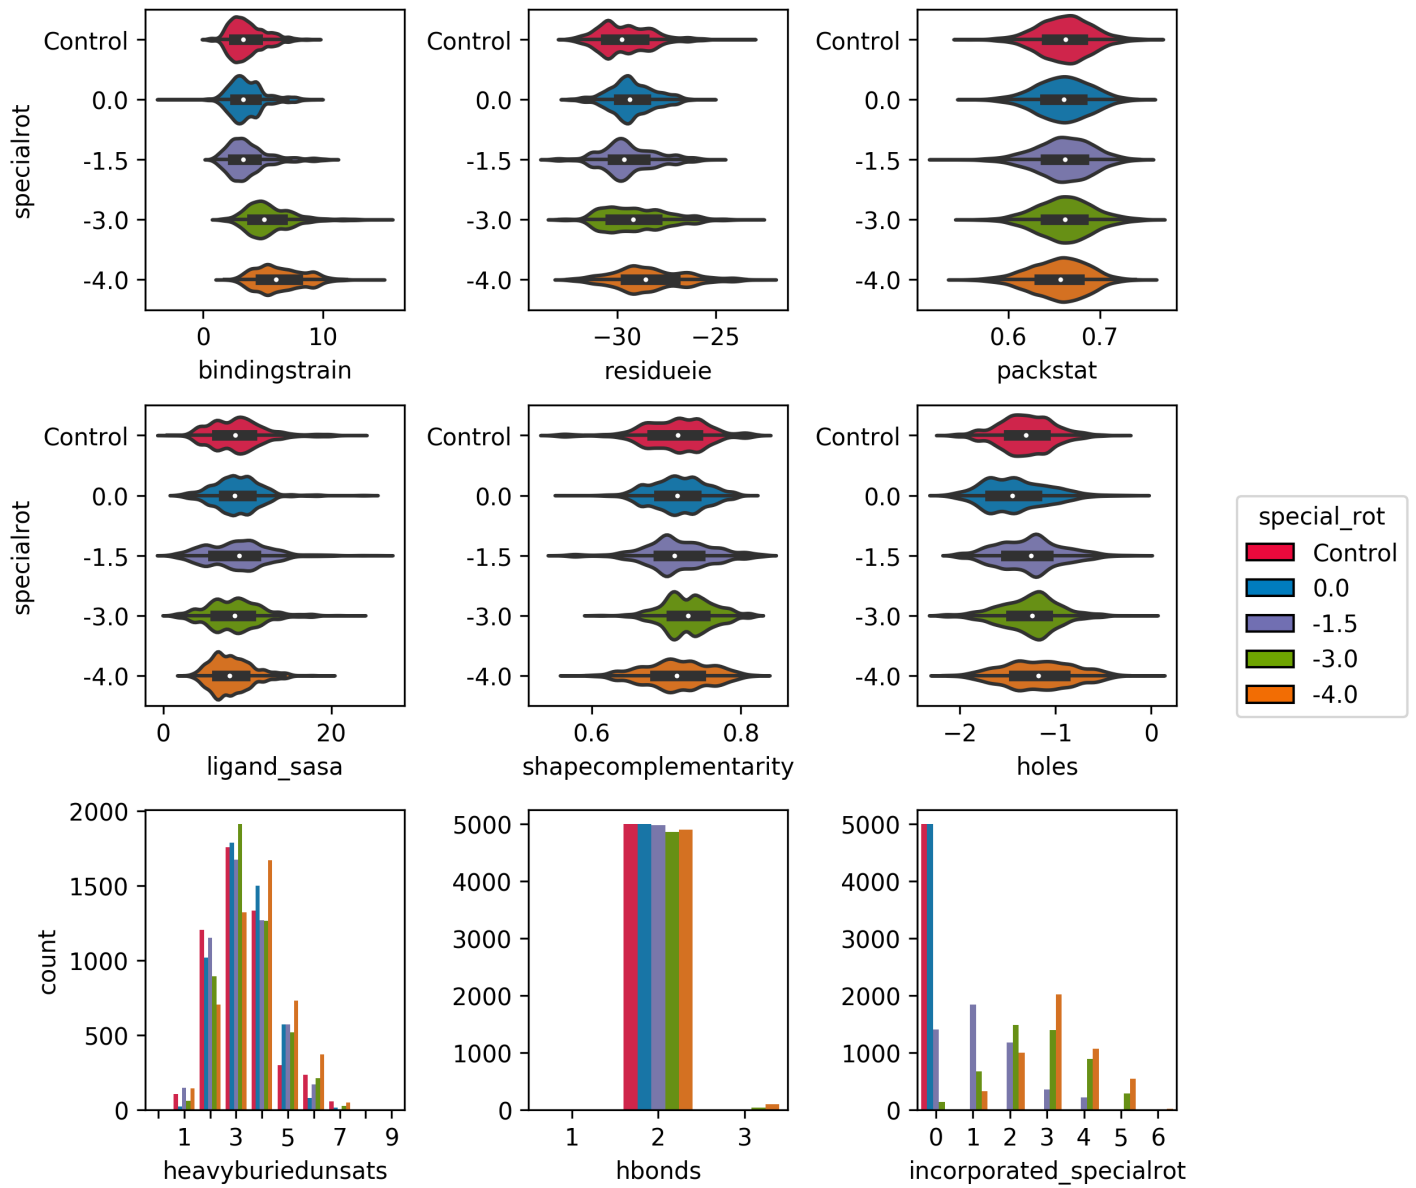

# 12 UM\_1\_R93W62Y38\_39\_3gzrA\_NPS\_0005

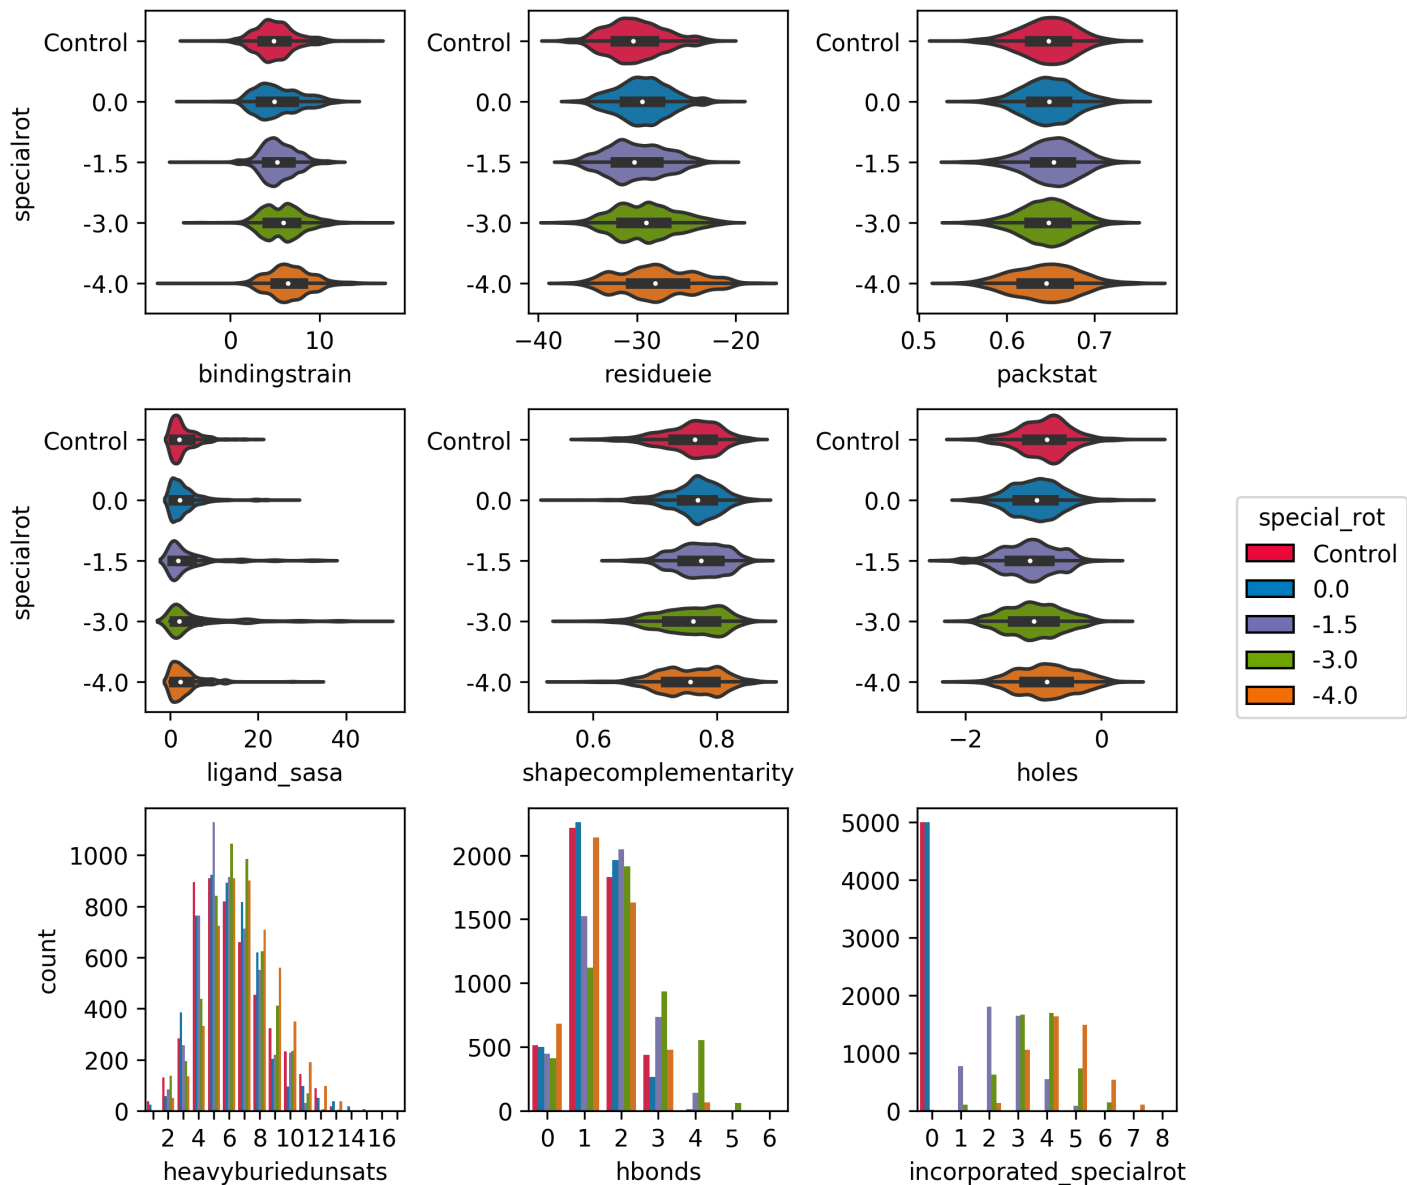

13 UM\_1\_W27Y49F124\_122\_2rcdA\_NPS\_0005

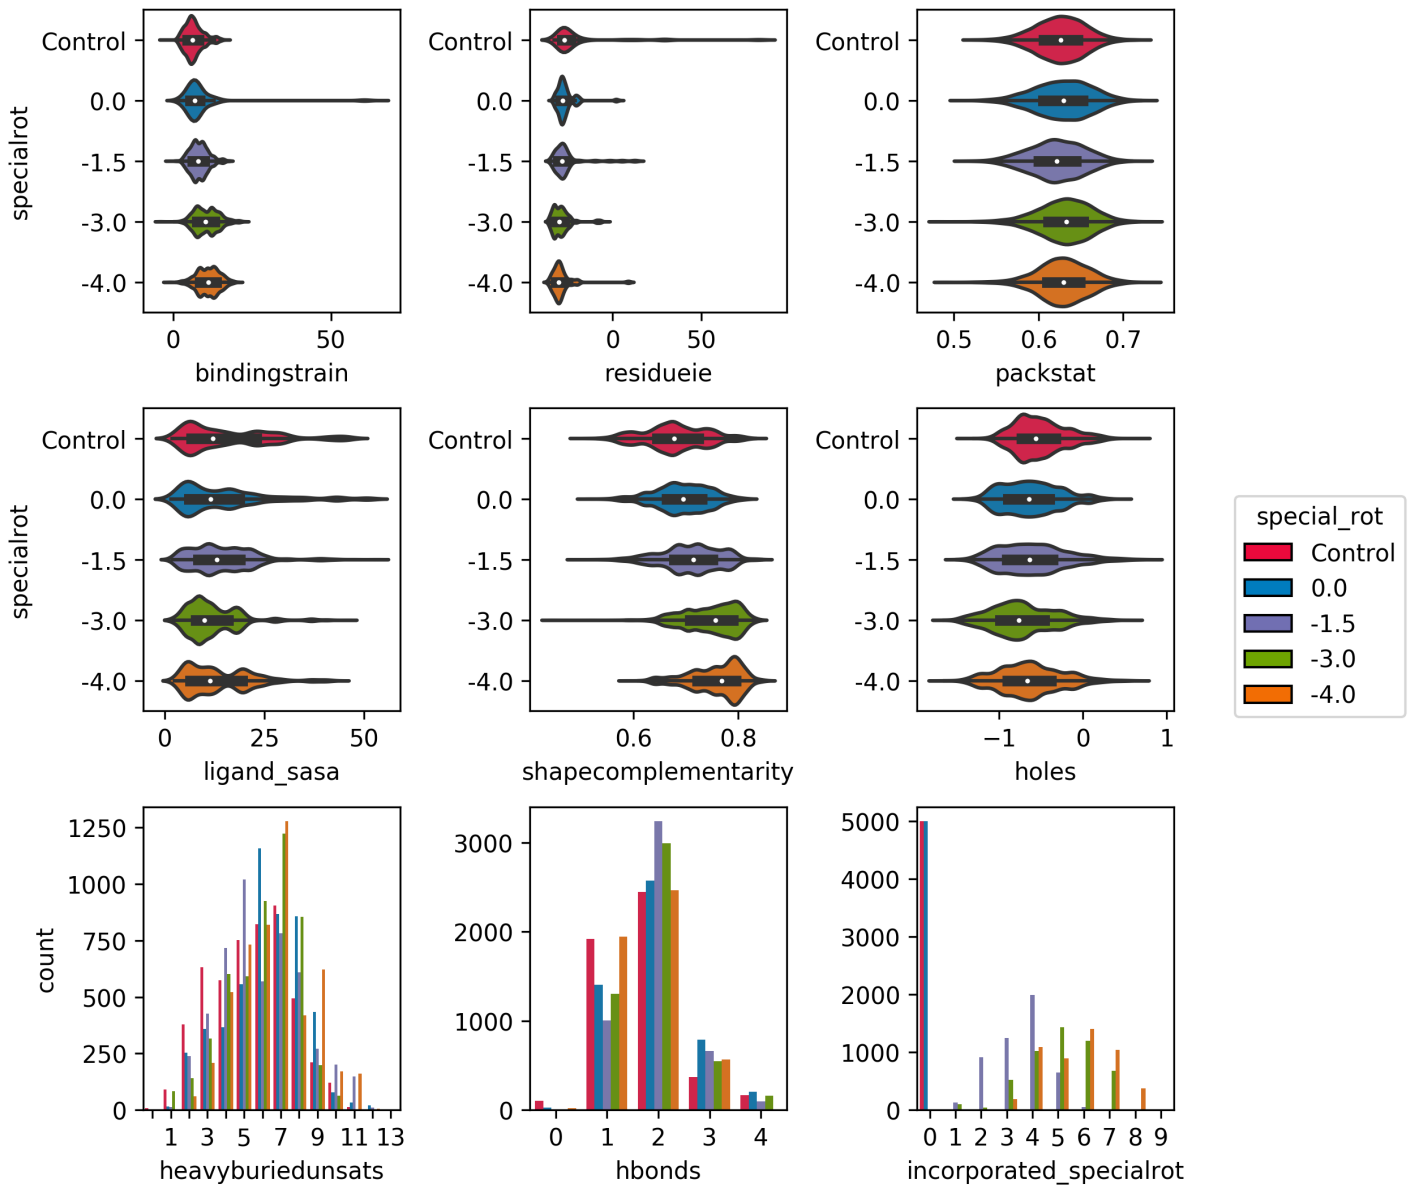

14 UM\_1\_Y49W60L53\_146\_3er7B\_DOG\_0001

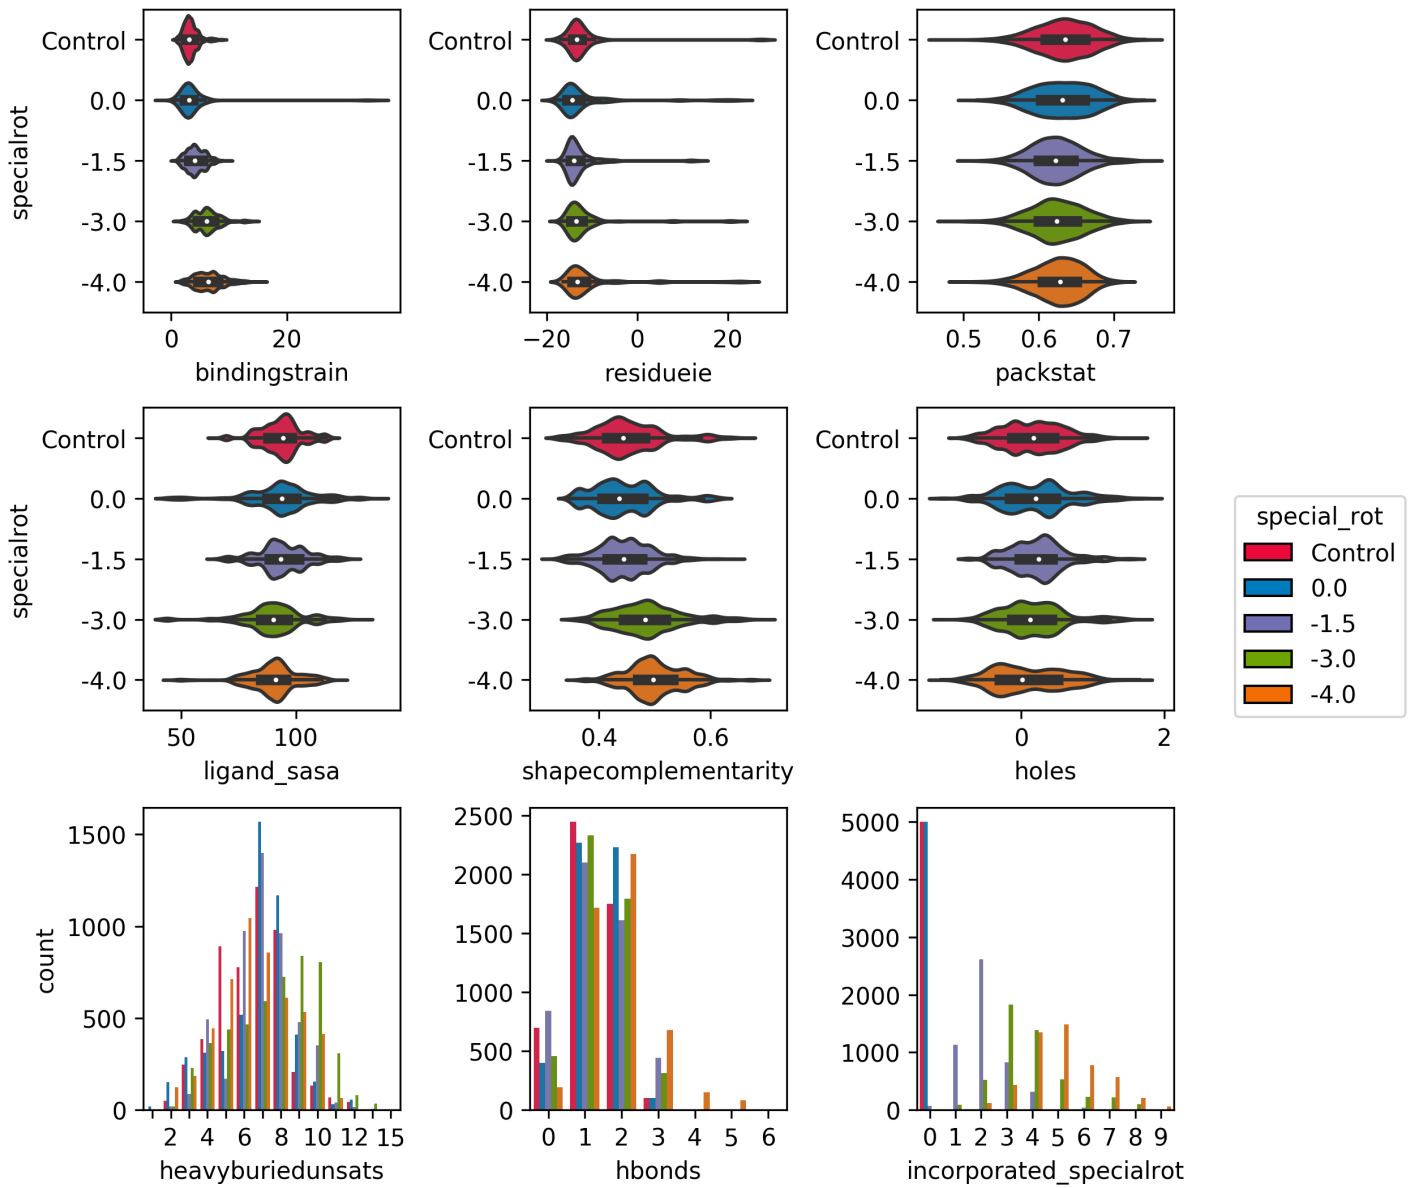

15 UM\_2\_F146V133M65\_3\_3emm\_11\_IM4\_0018

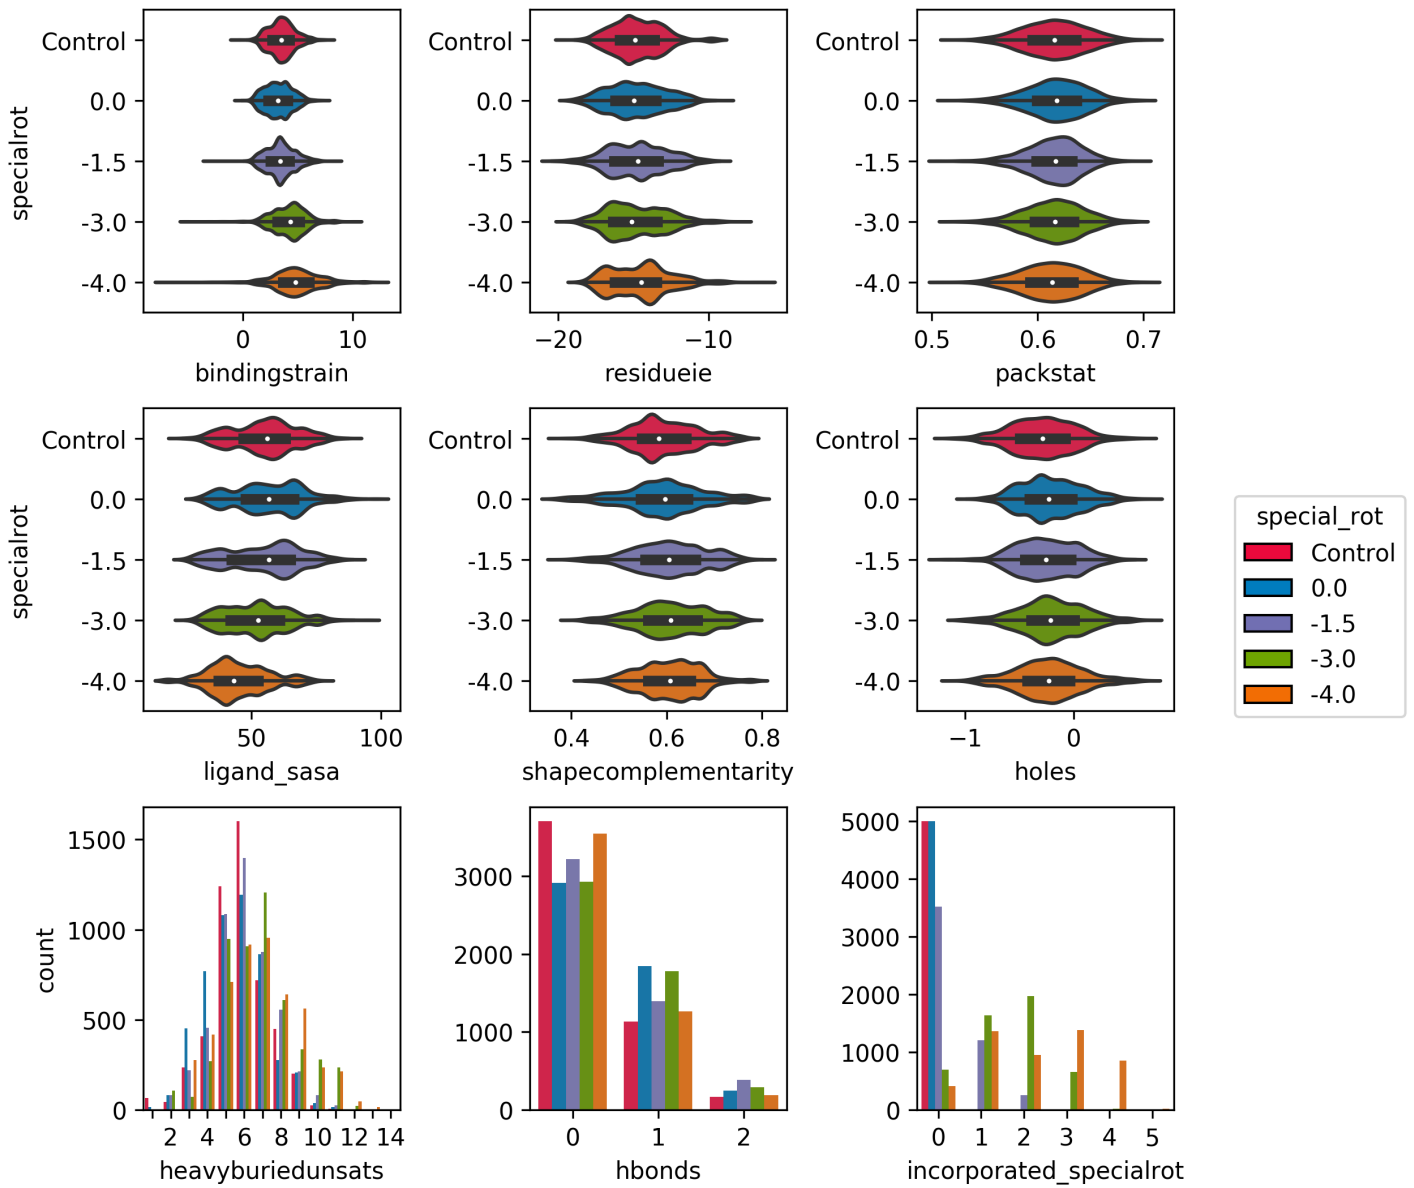

Supplement: pcbi.1008178.s006.pdf [file pcbi.1008178.s006.pdf]
